# Natural selection on *TMPRSS6* associated with the blunted erythropoiesis and improved blood viscosity in Tibetan Pigs

Xiaoyan Kong <sup>1¶</sup>, Xinxing Dong <sup>1¶</sup>, Shuli Yang <sup>1¶</sup>, Jinhua Qian<sup>2</sup>, Jianfa Yang<sup>1</sup>, Qiang Jiang<sup>3</sup>, Xingrun Li<sup>4</sup>, Bo Wang<sup>5</sup>, Dawei Yan<sup>1</sup>, Shaoxiong Lu<sup>1</sup>, Huaming Mao<sup>1\*</sup>, Xiao Gou<sup>1\*</sup>

<sup>1</sup> Faculty of Animal Science and Technology, Yunnan Agricultural University, Kunming, Yunnan, China

<sup>2</sup> Department of Animal Science, Yuxi Agriculture Vocational-Technical College, Yuxi, Yunnan, China

<sup>3</sup>Dairy Cattle Research Center, Shandong Academy of Agricultural Science, Jinan, Shandong, China

<sup>4</sup>Department of Animal Science, Dali Vocational and Technical College of Agriculture and Forestry, Dali, Yunnan, China

<sup>5</sup> Research Experimental Center, Yunnan University of Traditional Chinese Medicine, Kunming, Yunnan, China

\* Corresponding authors  
maohm@vip.sina.com (HMM); gouxiaosa@163.com (XG)

¶These authors contributed equally to this work.

## Abstract

Tibetan pigs, indigenous to Tibetan plateau, are well adapted to hypoxia. So far, there have been not any definitively described genes and functional sites responsible for hypoxia adaptation for the Tibetan pig. Here we conducted resequencing of the nearly entire genomic region (40.1 kb) of the candidate gene *TMPRSS6* (Transmembrane protease, serine 6) associated with hemoglobin concentration (HGB) and red blood cell count (RBC) in 40 domestic pigs and 40 wild boars from five altitudes along the Tea-horse ancient road and identified 708 SNPs, in addition to an indel (CGTG/----) in the intron 10. Both the CGTG deletion frequency and the pairwise  $r^2$  linkage disequilibrium showed an increase with elevated altitudes in 838 domestic pigs from five altitudes, suggesting that *TMPRSS6* has been under Darwinian positive selection. As the conserved core sequence of hypoxia-response elements (HREs), the deletion of CGTG in Tibetan pigs decreased the expression levels of *TMPRSS6* mRNA and protein in the liver revealed by real-time quantitative PCR and western blot, respectively. To explore whether reduced *TMPRSS6* expression level could improve blood viscosity, the relationship between CGTG indel and hematologic and hemorheologic parameters in 482 domestic pigs from continuous altitudes was detected and dissected a genetic effect on reducing HGB by 13.25g/L in Gongbo'gyamda Tibetan pigs and decreasing MCV by 4.79 fl in Diqing Tibetan pigs. In conclusion, the CGTG deletion of *TMPRSS6* resulted in lower HGB and smaller MCV, thereby blunting erythropoiesis and improving blood viscosity as well as erythrocyte deformability.

55 **Keywords:** Tibetan Pigs; *TMPRSS6*; HGB; CGTG indel; High-altitude adaptation

## 56 **Introduction**

57 The Tibetan pig lives at an average elevation of approximately 3500 m on Tibetan  
58 plateau [1], due to the availability of well-adapted extreme conditions including low  
59 ambient temperature, high ultraviolet radiation, harsh climate, and low oxygen [2].  
60 For thousands of years, Tibetan pigs have developed complex phenotypic and  
61 physiological adaptations to high-altitude hypoxia compared with lowland pigs [3].  
62 When animals are exposed to chronic hypoxia, the pulmonary artery pressure and red  
63 blood cell count (RBC) increase, causing pulmonary hypertension and right  
64 ventricular hypertrophy. Experimental evidence indicates that pulmonary artery  
65 pressure, pulmonary artery wedge pressure, cardiac output and pulmonary vascular  
66 resistance increase with increased elevations in pigs [4].

67 The hypoxia-induced increase in RBC and HGB, thereby rising blood viscosity and  
68 resistance, result in pulmonary hypertension and right-heart failure [5]. In the past few  
69 years, increasing attentions have been devoted to identify the genes related to blood  
70 physiology underlying the adaptation to high-altitude hypoxia for Tibetans [6–9],  
71 yaks [10,11], Tibetan chickens [12], Tibetan antelopes [13], pikas [14], Tibetan pigs  
72 [2,3,15], and deer mice [16]. Multiple genome-wide scans showed that positive  
73 selection in human beings and animals at high altitude occurred mainly in the  
74 hypoxia-inducible factor (HIF) signaling pathway [3,6,17–24]. In this pathway,  
75 *EPAS1* (endothelial PAS domain protein 1) and *EGLN1* (egl nine homolog 1) are key  
76 genes that correlated significantly with hemoglobin concentration [6,11,23,25–27].

77 The genome-wide associated with blood physiology also revealed that the gene  
78 *TMPRSS6* (Transmembrane protease, serine 6, one of the downstream genes in the  
79 HIF pathway) was strongly correlated with serum iron concentration [28,29,38–  
80 43,30–37], RBC, and HGB [44–46]. This gene encodes a type II transmembrane  
81 serine proteinase (Matriptase 2) expressing in the liver [47], and regulates the iron  
82 metabolism by controlling the hepcidin expression [33,35,37,39,48,49]. A  
83 genome-wide meta-analysis also identifies *TMPRSS6* associated with hematological  
84 parameters in the HaemGen consortium [46]. Current evidence allso suggests that the  
85 *TMPRSS6* variants were significantly associated with plasma ferritin, hemoglobin,  
86 risk of iron overload, and type 2 diabetes in Chinese Hans [50]. Several lines of  
87 evidence, mutations in *TMPRSS6* are known to be associated with cause  
88 iron-refractory iron deficiency anemia [36,37,41,42,51,52] or iron  
89 deficiency[31,35,53–55], especially one mutation 736 (V) allele (rs855791) allele  
90 tended to be associated with low Hb levels and iron status in humans  
91 [35,36,38,39,44,45,56].

92 In this study, we aim to probe into the potential role of the *TMPRSS6* gene  
93 underlying blood physiological adaptation to high-altitude Tibetan pigs.  
94 Resequencing of the nearly complete genomic region of *TMPRSS6* (40.1 kb) was  
95 conducted to explore the molecular mechanism of adaptation to high-altitude hypoxia  
96 in Tibetan pigs. Otherwise, real-time quantitative PCR and western blot were  
97 performed to determine the expression level of *TMPRSS6*. Meanwhile, hematologic  
98 and hemorheologic parameters were measured to analyze the association with

*TMPRSS6*, including red blood cell count (RBC), hemoglobin concentration (HGB), hematocrit (HCT), mean corpuscular volume (MCV), mean corpuscular hemoglobin (MCH), mean corpuscular hemoglobin concentration (MCHC) and red blood cell distribution width (RDW).

## **Materials and methods**

### **Ethics Statement**

All animal experimental procedures were performed according to the Guide for the Care and Use of Laboratory Animals (Ministry of Science and Technology of China, 2006).

### **Animal and sample preparation**

In this study, a total of 838 domestic pigs were included, in which 353 Tibetan pigs were from 5 different locations in Tibetan plateau and 485 pigs were from 9 domestic breeds across the other three altitudes along the Tea-horse ancient road, and 40 Chinese wild boars were sampled from 5 continuous altitudes along the Tea-horse ancient road. Sample size and localization of each population were shown in [Supplementary Table S1 and Fig 1](#). 80 individuals including 40 domestic pigs and 40 Chinese wild boars were used for *TMPRSS6* resequencing. 838 pigs were genotyped for haplotype analyze of *TMPRSS6* gene. Hematologic and hemorheologic parameters ([Table S2](#)) of 482 pigs from the 838 domestic pigs were detected. Ten Gongbo'gyamda Tibetan pigs with genotype DD (n = 5) and II (n = 5) were selected to detect expression level of mRNA and protein by real-time quantitative PCR

(RT-qPCR) and western-blot experiments. Liver tissue specimens were collected and immediately frozen in liquid nitrogen.

**Fig 1. Sampling and geographic locations of the pig breeds.** The red, yellow, green, blue and purple indicated high level of high altitude (HHA, 3600 meters), middle level of high altitude (MHA, 3300 meters), low level of high altitude (LHA, 2500 meters), middle level of altitude (MH, 1600 meters) and low level of altitude (LA, 550 meters), respectively. TT, Tibetan (Gongbo'gyamda); YNT, Tibetan (Yunnan); SCT, Tibetan (Sichuan); QHT, Tibetan (Qinghai); GST, Tibetan (Gansu); LJ, Lijiang; BS, Baoshan; SB, Saba; DN, Diannanxiaoe; TC, Tengchong; GL, HighLiGongshan.

### Resequencing, genotyping and haplotype analysis

The *TMPRSS6* gene (Genbank accession no. NC\_010447) was resequenced in 40 domestic pigs and 40 wild boars across 5 continuous altitudes, 10 individuals per altitude. A sample of 5 mL blood from each individual pig was obtained from the jugular vein. Blood genomic DNA was extracted with a Genomic DNA Isolation Kit (Bactec, Beijing, China) according to the manufacturer's instructions. We designed 55 pairs of primers to amplify the entire gene, including 17 pairs of primers for exons and 38 pairs of primers for introns (Table S3). PCR was performed in 25  $\mu$ L reaction volume. The ingredient comprised 2  $\mu$ L DNA template, 11  $\mu$ L Mix, 1  $\mu$ mol/L of each forward and reverse primer and 10  $\mu$ L ddH<sub>2</sub>O. PCR procedure was performed as following: initial denaturation for 5 min at 95 °C, followed by 36 cycles of 95°C for 30 s; annealing at prescribed annealing temperature (Table S3) for 30 s; and extension at 72°C for 45 s. The final extension was performed at 72°C for 8 min. PCR products

were sequenced using an ABI 3730 sequence analyzer (Applied Biosystems, Foster City, CA). *TMPRSS6* SNPs were genotyped also by Sanger sequencing. The sequence polymorphisms were analyzed using MEGA7 software[57]. The LD map of *TMPRSS6* SNPs in the domestic pigs and wild boars was constructed by Haploview using the  $r^2$  algorithm [58].

### **Hematologic and Hemorheologic parameters**

Hematologic parameters were measured by BC-2800Vet Auto Hematology Analyzer (Mindray Co., Ltd.). The following measurements were obtained: red blood cell count (RBC), hemoglobin concentration (HGB), hematocrit (HCT), mean corpuscular volume (MCV), mean corpuscular hemoglobin (MCH), mean corpuscular hemoglobin concentration (MCHC) and red blood cell distribution width (RDW), respectively. Hemorheologic parameters were measured using a ZL1000 Auto Blood Rheology Analyzer (Zonci Co., Ltd.) at a constant temperature of 37°C. The following measurements were obtained: fibrinogen (FB), plasma viscosity (PV), whole blood relative index of low shear (WLS) at shear rate of 1  $S^{-1}$ , whole blood relative index of middle shear (WMS) at shear rate of 5  $S^{-1}$ , whole blood relative index of high shear (WHS) at shear rate of 200  $S^{-1}$ , RBC aggregation index (EAI), RBC aggregation coefficient (EAC), casson viscosity (CV), RBC internal viscosity (RBCIV), low shear flow resistance (LSFR) at shear rate of 1  $S^{-1}$ , middle shear flow resistance (MSFR) at shear rate of 5  $S^{-1}$ , high shear flow resistance (HSFR) at shear rate of 200  $S^{-1}$ , yield stress (YS) respectively. Parameters were measured immediately after veinpuncture.

## Real-time quantitative PCR

Total RNA was extracted from the livers with total RNA extraction kit(DP419) (Tiangen, Beijing, China). The concentration and purity of RNA were determined with a NanoDrop 2000 Biophotometer (Thermo Fisher Scientific Inc., West Palm Beach, FL, USA) and integrity was verified by electrophoresis in a 1% agarose gel. After treatment with DNase I, 2 µg of RNA in a 20 µL reaction volume was reversely transcribed into cDNA using a cDNA Kit (TaKaRa, Dali, China). To avoid genomic DNA contamination, Primer Premier 5.0 software was used to design *TMPRSS6* gene (XM\_001924749) primers that amplified products spanning an intron. The primers were 5'-CCCGATTTCGCTCTTCTCC-3' and 5'-GGCACCTTCCTTTCA CCC-3'. The 28s rRNA (DQ297674) was used as the internal standard and its primers were 5'-CGGGATGAACCGAACGC-3' and 5'-GCCACCGTCCTGCTGTCT-3'. Real-time quantitative PCR (RT-qPCR) was conducted on the Bio-Rad CFX96 System (Bio-Rad, USA). Each reaction mixture contained 10.0 µL 2×SYBR Green qPCR SuperMix (Transgen, Beijing, China), 1.0 µL cDNA, 0.5 µL of each primer (10.0 nmol/µL), ddH<sub>2</sub>O water was added to adjust the volume to 20.0 µL. The RT-qPCR program started with denaturation at 95 °C for 15 min followed by 39 cycles of denaturation at 95 °C for 10 s and annealing elongation at 63 °C for 30 s, during which fluorescence was measured. Next, a melting curve was constructed by increasing the temperature from 65 °C to 95 °C in sequential steps of 0.5 °C for 5 s, during which fluorescence was measured. The RT-qPCR efficiency of each pair of primers was calculated using 5 points in a 5-fold dilution series of cDNA, which was



used to construct a standard curve. A cDNA pool of all samples was used as a calibration and three replications of each sample were performed. Gene expression levels were calculated using the  $2^{-\Delta\Delta Ct}$  method ( $\Delta\Delta Ct = \Delta Ct \text{ target gene} - \Delta Ct \text{ 28srRNA gene}$ ) as previously described [59].

## Western blot

The liver tissue was homogenized using a Mixer MillMM400 (Retsch, Germany) for 5 min and then centrifuged at  $10,000 \times g$  for 10 min at 4 °C. Protein concentrations were determined using a Protein Assay Kit (Bio-Rad). Proteins (40 µg) were separated by sodium dodecyl sulfate polyacrylamide gel electrophoresis (SDS- PAGE) using a 5% stacking gel and a 10 % separating gel. Following electrophoresis, proteins were transferred to Immobilon-P Transfer Membranes (IPVH00010) for 2 h at 300 mA using a Bio-Rad Criterion Blotter. Membranes were blocked overnight in blocking buffer (P0023B, Beyotime Ltd., China) and then incubated with primary mouse monoclonal *GAPDH* (1:1,000 dilution, AG019, Beyotime Ltd., China) and Anti-tmpss6 (n-terminal) polyclonal antibody (1:500 dilution, Sigma) diluted in primary antibody dilution buffer (P0023A, Beyotime Ltd., China) at 4 °C for 2 h. The membranes were washed 3 times with PBST (phosphate buffer saline containing 0.1 % Tween 20), and incubated with secondary goat anti-rabbit (1:1,000 dilution, A0216, Beyotime Ltd., China) antibody diluted in secondary antibody dilution buffer (P0023D, Beyotime Ltd., China) for 1 h. After the membranes were washed 3 times in Tris-buffered saline with Tween for 30 min, immune complexes were visualized using an eECL Western Blot Kit (CW0049A, CWBIO Ltd., China) according to the

manufacturer's instructions. To determine expression ratio of *TMPRSS6*, western blot was analyzed using Image J 1.44 software (NIH, USA).

## Statistical analysis

Correlation coefficient between the altitudes and frequencies of CGTG deletion were calculated using the *F* test in SAS software (ver. 9.0). Candidate gene association of *TMPRSS6* SNP genotypes with Hematologic and Hemorheologic parameters was performed only within the same population or the population at the same elevation. The *F* test in the analyze of variance (ANOVA) in the SAS software (ver. 9.0) was used to analyze the association based on the following linear model:  $Y_{ijkl} = \mu + G_i + S_k + A_j + e_{ijkl}$ . Where,  $Y_{ijkl}$  was the phenotypic value of the target trait,  $\mu$  was the population mean,  $G_i$  was the effect of the  $i^{\text{th}}$  genotype,  $S_k$  was the effect of  $k^{\text{th}}$  gender,  $A_j$  was the effect of the  $j^{\text{th}}$  age, and  $e_{ijkl}$  was the random residual [60].

## Results

### Complete sequence of *TMPRSS6* and discovery of a selected CGTG indel

To reveal the detailed pattern of sequence variations of *TMPRSS6* in pigs, resequencing of the entire genomic region of *TMPRSS6* (about 40.1 kb) was conducted firstly covering 30.1-kb exon-intron region, 7.4-kb 5'-region and 0.6-kb 3'-region. Totally, 80 pigs were resequenced including 40 domestic pigs and 40 wild boars across continuous altitudes along the ancient Tea-horse road. A total of 708 SNPs (Table S1) were screened and all of variations were synonymous SNPs. The linkage disequilibrium (LD) plot of 708 SNPs in 4 domestic pig populations and 4 wild boar population were shown in Fig 2. Tibetan pigs and Tibetan wild boars living

in high altitude above 3000 m displayed higher LD compared with the other pigs. And the LD increased with elevated altitudes, suggesting that altitude selection on *TMPRSS6* has been consistent in both domestic pigs and wild boars. Specifically, an CGTG indel occurred in the intron 10 of *TMPRSS6* gene, closely linked with SNP13, SNP15 and SNP16. The CGTG acted as the conserved core sequence of hypoxia-response elements (HREs) [61] which bound to many oxygen-regulated genes by hypoxia induced factors (HIFs). Therefore, extensive samples were needed to determine the intron 10 sequence of *TMPRSS6* gene to further reveal whether the CGTG indel played a potential role in high-altitude adaptation of Tibetan pigs.

**Fig 2. Pairwise  $r^2$  linkage disequilibrium spanning entire *TMPRSS6* gene in pig breeds along continuous altitudes.** A total of 708 SNPs of nearly whole *TMPRSS6* gene from 40 domestic pigs and 40 wild boars were included. The SNPs with minor allele frequency smaller than 10% were removed. Darker shading indicates higher levels of LD. (A) LA domestic pigs; (B) LA wild boars; (C), MA domestic pigs; (D) MA wild boars; (E) LHA domestic pigs; (F) LHA wild boars; (G) MHA domestic pigs; (H) MHA wild boars.

#### **Positive selection analysis of intron 10 in *TMPRSS6* gene**

To test whether the observed CGTG indel was a hypoxia-selected site, the intron 10 of *TMPRSS6* gene was sequenced in a total of 838 domestic pigs from 5 altitudes along the Tea-horse ancient road (Table S1 and Fig 1). As a result, 16 SNPs and the CGTG indel were screened. Genotype frequency and allele frequency were listed in Table S4. In the 5 altitude pig populations from 500 m to 3500 m, the frequencies of CGTG deletion in domestic pigs were 44.3%, 46.9%, 51.8%, 53.7% and 62.2%,

respectively. In addition, the correlation between the allele frequency of CGTG indel and altitude was analyzed and a strong positive correlation ( $r=0.959$ ,  $P=0.005$ ) in domestic pigs was found (Fig 3 and Fig 4), implicating that the prevalent CGTG deletion might play a key role in contributing to high-altitude hypoxia adaptation in Tibetan pigs. Pairwise  $r^2$  linkage disequilibrium for the 16 SNPs were separately analyzed in pig breeds across continuous altitudes, and elevated  $r^2$  values among the CGTG indel and its three neighboring sites (SNP13, SNP15, SNP16) with increased altitudes (Fig 5) suggested a genetic hitchhiking effect in domestic pigs across continuous altitudes.

**Fig 3. The correlation between CGTG deletion frequency and altitude in domestic pigs.** Plot of the correlation analysis between frequencies of the CGTG deletion and the altitudes among domestic pigs, “r” represents the correlation coefficient ( $r = 0.959$ ,  $P = 0.005$ ).

**Fig 4. Altitudinal pattern of allele frequency variation at the CGTG indel in pig breeds across continuous altitudes.** In the pie diagram, the frequency of the deletion allele was shown in red. From south to north, the sampling altitudes were HHA (3500 m), MHA (3000 m), LHA (2500 m), MA (1500 m) and LA (500 m).

**Fig 5. Pairwise  $r^2$  linkage disequilibrium spanning the intron 10 in pig breeds across continuous altitudes.** A total of 16 SNPs from 838 domestic pigs were included. The SNPs with minor allele frequency smaller than 10% were removed. Darker shading indicated higher levels of LD. (A) LA domestic pigs; (B) MA domestic pigs; (C) LHA domestic pigs; (D) MHA Tibetan pigs; (E) HHA Tibetan pigs.

## Association of the CGTG indel with blood physiological parameters

Genome-wide association study had established the association between variants in *TMPRSS6* and hemoglobin level in humans [44,46]. To further investigate the role of the CGTG deletion of *TMPRSS6* in blood physiological adaptation, we genotyped the CGTG indel and measured 20 indexes of the hematologic and hemorheologic parameters in two high-altitude Tibetan pig populations (HHA and MHA) and three other altitude pig populations (LHA, MH and LA). As shown in Table 1, the CGTG indel was significantly associated with HGB and RBC in HHA Tibetan pigs, and both RBC and HGB value of the insertion homozygote (II) were significantly higher than those of the deletion homozygote (DD) ( $p < 0.01$ ), which was accompanied by similar statistically tendencies for hemorheologic parameter WLS, WMS and WHS ( $p < 0.05$ ). The sex- and age-adjusted HGB and RBC were 13.25 g/L and  $0.64 \times 10^6/\mu\text{L}$  lower in the DD genotype compared with the II genotype in HHA Tibetan pigs. By contrast, the significant differences between genotypes for hematologic parameter HGB, MCV, and hemorheologic parameter CV, YS, LSFR, MSFR, HSFR ( $p < 0.01$  for MCV,  $p < 0.05$  for the others) occurred in MHA Tibetan pigs (Table 2). There were no significant differences for hematologic and hemorheologic parameters in the other three altitude breeds ( $p > 0.05$ ) (S5-7 Tables), suggesting that the CGTG deletion might play important roles in lowering HGB to improve blood viscosity.

**Table 1. Association of the CGTG indel with hematologic and hemorheologic parameters in Tibetan pigs at 3600 m.**

| DD (n=36) | DI (n=54) | II (n=13) |
|-----------|-----------|-----------|
|-----------|-----------|-----------|

|                                 |              |              |              |
|---------------------------------|--------------|--------------|--------------|
| <b>RBC (10<sup>6</sup>/ul)</b>  | 7.36±0.13B   | 7.65±0.10AB  | 8.00±0.21A   |
| <b>HGB (g/L)</b>                | 128.55±2.22B | 134.16±1.8AB | 141.80±3.54A |
| <b>HCT (%)</b>                  | 42.44±0.73B  | 43.88±0.60AB | 46.11±1.17A  |
| <b>MCV (fl)</b>                 | 58.01±0.67   | 57.61±0.55   | 57.86±1.08   |
| <b>MCH (pg)</b>                 | 17.50±0.20   | 17.51±0.16   | 17.72±0.32   |
| <b>MCHC (g/L)</b>               | 302.67±1.45  | 305.19±1.18  | 307.18±2.32  |
| <b>RDW (%)</b>                  | 15.40±0.17   | 15.65±0.14   | 15.25±0.27   |
| <b>FB (g/L)</b>                 | 3.89±0.09    | 3.97±0.07    | 3.66±0.14    |
| <b>PV (mpa·s)</b>               | 1.77±0.05    | 1.78±0.04    | 1.66±0.08    |
| <b>WLS</b>                      | 13.85±0.43   | 14.01±0.35   | 15.17±0.69   |
| <b>WMS</b>                      | 3.63±0.12    | 3.61±0.10    | 4.01±0.20    |
| <b>WHS</b>                      | 2.75±0.1     | 2.72±0.08    | 3.04±0.16    |
| <b>EAI</b>                      | 5.09±0.11    | 5.20±0.09    | 5.09±0.18    |
| <b>EAC</b>                      | 3.49±0.08    | 3.57±0.06    | 3.49±0.12    |
| <b>CV (mpa·s)</b>               | 3.95±0.14    | 3.94±0.12    | 4.17±0.23    |
| <b>RBCIV (mpa·s)</b>            | 0.71±0.02    | 0.72±0.01    | 0.67±0.03    |
| <b>LSFR (10<sup>9</sup> SI)</b> | 72.62±1.94   | 74.00±1.57   | 75.17±3.09   |
| <b>MSFR (10<sup>9</sup> SI)</b> | 44.53±1.37   | 44.72±1.11   | 46.64±2.18   |
| <b>HSFR (10<sup>9</sup> SI)</b> | 33.63±1.13   | 33.64±0.92   | 35.37±1.81   |
| <b>YS (mpa)</b>                 | 8.71±0.29    | 9.01±0.24    | 8.93±0.47    |

293 Note: Different lowercase letters and capital letters in the same row represent significant and  
294 extreme difference at 0.05 and 0.01 levels, respectively.

295 **Table 2. Association between CGTG indel and hematologic and hemorheologic parameters**  
 296 **in Tibetan pigs at 3300 m.**

|                                 | <b>DD (n=12)</b> | <b>DI (n=17)</b> | <b>II (n=15)</b> |
|---------------------------------|------------------|------------------|------------------|
| <b>RBC (10<sup>6</sup>/ul)</b>  | 7.19±0.25        | 7.49±0.20        | 7.08±0.19        |
| <b>HGB (g/L)</b>                | 127.07±3.65b     | 134.80±2.82ab    | 136.65±2.96a     |
| <b>HCT (%)</b>                  | 41.03±1.09b      | 43.58±0.84a      | 44.60±0.88a      |
| <b>MCV (fl)</b>                 | 57.30±1.38B      | 60.08±1.12AB     | 62.09±1.07A      |
| <b>MCH (pg)</b>                 | 17.67±0.46b      | 18.31±0.38a      | 19.14±0.36a      |
| <b>MCHC (g/L)</b>               | 309.20±2.75      | 305.86±2.23      | 308.56±2.13      |
| <b>RDW (%)</b>                  | 16.00±0.34       | 15.42±0.28       | 14.92±0.27       |
| <b>FB (g/L)</b>                 | 4.81±0.34        | 5.43±0.28        | 5.22±0.26        |
| <b>PV (mpa·s)</b>               | 2.17±0.16        | 2.47±0.13        | 2.37±0.12        |
| <b>WLS</b>                      | 9.75±0.78        | 9.12±0.64        | 10±0.61          |
| <b>WMS</b>                      | 2.53±0.19        | 2.38±0.15        | 2.57±0.15        |
| <b>WHS</b>                      | 1.89±0.14        | 1.78±0.11        | 1.91±0.11        |
| <b>EAI</b>                      | 5.17±0.16        | 5.06±0.13        | 5.23±0.12        |
| <b>EAC</b>                      | 3.53±0.11        | 3.47±0.09        | 3.6±0.08         |
| <b>CV (mpa·s)</b>               | 3.18±0.13        | 3.48±0.11        | 3.57±0.10        |
| <b>RBCIV (mpa·s)</b>            | 0.89±0.06        | 0.98±0.05        | 0.95±0.05        |
| <b>LSFR (10<sup>9</sup> SI)</b> | 60.10±3.60       | 64.87±2.92       | 68.56±2.79       |
| <b>MSFR (10<sup>9</sup> SI)</b> | 36.26±1.65       | 39.51±1.34       | 40.87±1.28       |

|                                 |            |            |            |
|---------------------------------|------------|------------|------------|
| <b>HSFR (10<sup>9</sup> SI)</b> | 27.24±1.18 | 29.78±0.95 | 30.62±0.91 |
| <b>YS (mpa)</b>                 | 7.32±0.59  | 7.82±0.48  | 8.48±0.45  |

Note: Different lowercase letters and capital letters in the same row represent significant and extreme difference at 0.05 and 0.01 levels, respectively.

### ***TMPRSS6* mRNA and protein expression**

To investigate the regulatory effect of CGTG deletion, *TMPRSS6* mRNA and protein expression level in livers [62] of HHA Tibetan pigs with genotype DD and II were detected, respectively. As shown in Fig 6A, the expression level of *TMPRSS6* mRNA in liver was significantly lower in DD genotype (n = 5) compared with that in the II genotype (n = 5) in HHA Tibetan pigs (P < 0.01). In addition, the matriptase-2 protein expression level was strikingly lower in DD genotype (n = 5) than that of the II genotype (n = 5) in HHA Tibetan pigs (Figs 6B and 6C). The consistent results from RT-qPCR and western blot showed that the CGTG deletion led to the lower expression level of mRNA and protein in *TMPRSS6*.

### **Fig 6. mRNA and protein expression levels of *TMPRSS6* in the livers of HHA Tibetan pigs.**

(A) The mRNA level of *TMPRSS6* in the livers of HHA Tibetan pigs with the DD (n = 5) and II (n = 5) genotype was measured by RT-qPCR. Error bars represent mean ± SD from five independent experiments. \*\*P < 0.01. (B) and (C) Western Blot was performed to detect the expression level of matriptase-2 protein encoded by *TMPRSS6* in HHA Tibetan pigs with the DD and II genotype. β-tubulin expression was used as the loading control. DD, deletion (n = 3); II, insertion (n = 3).



## Discussion

The Tibetan pig is one of typical high altitude domestic animals. *TMPRSS6* is the typical gene correlated with the high-altitude adaption of the Tibetan pigs. And the protein encoded by *TMPRSS6* is Matriptase 2 that expresses in the liver and regulates the expression of the systemic iron regulatory hormone hepcidin [51]. The hepatic hormone hepcidin regulates body iron metabolism based on the two mechanisms, the “stores regulator” and the “erythroid regulator” [63–69]. Genome-wide association studies (GWAS) have found that four erythrocyte traits, including Hb, Hct, MCH and MCV, were significantly associated with *TMPRSS6* in human [38,44,70]. To explore the molecular mechanism of adaptation to high-altitude hypoxia in Tibetan pigs, we conducted resequencing of the nearly complete genomic region of *TMPRSS6* (40.1 kb) in 40 domestic pigs and 40 wild boars and identified one CGTG deletion highly prevalent in Tibetan pigs. Haplotype analysis of sequence variations in *TMPRSS6* gene in pig populations along continuous altitudes revealed a hitchhiking effect close to CGTG deletion, suggesting that *TMPRSS6* has been under Darwinian positive selection. The deletion of CGTG in Tibetan pigs decreased the expression levels of *TMPRSS6* mRNA and protein in the liver. The association of the CGTG deletion with blood physiology dissected a blunted erythropoietic response to high-altitude hypoxia in Tibetan pigs.

To test the signal of selection and identify causal sequence variations, resequencing of the entire genomic region of candidate *TMPRSS6* gene was performed in 40 domestic pigs and 40 wild boars across five altitudes. As a result, 708 SNPs were

identified, in addition to one specific CGTG deletion in intron 10 highly prevalent in Tibetan pigs (53.7% and 62.2%). Haplotype analysis of sequence variants in *TMPRSS6* gene among pig populations across continuous altitudes revealed a hitchhiking effect occurring close to CGTG deletion, suggesting that *TMPRSS6* has been under Darwinian positive selection. Semenza and Wang [71] had proved *HIF-1*, consensus DNA binding site was a nuclear factor that was induced by hypoxia and bound to the hypoxia response element (HRE) and contained CGTG as the conserved core sequence [61]. An extensive sample of 838 domestic pigs across 5 continuous altitudes were collected to detect gene frequency of the CGTG deletion. A strong linear correlation ( $r = 0.959$ ,  $p = 0.005$ ) between the CGTG deletion frequency and altitude gradient as well as an increased LD with elevated altitude level revealed that the CGTG indel site might be potentially selected by hypoxia.

Seen from genetic effect size, the CGTG indel showed the strong association with hemoglobin levels in HHA Tibetan pigs and its genetic effect on reducing HGB was up to 13.25 g/L. This result also explained the unchanged HGB in HHA Tibetan pigs compared with the MHA Tibetan pigs because of more CGTG deletion in HHA Tibetan pigs. This finding was consistent with Tibetans with whom the major Tibetan alleles at *EGLN1* and *EPAS1* were also associated with lower hemoglobin concentrations, both of which were associated with the HIF pathway [72–75]. Notably, except for HGB, the effects of the CGTG deletion on blood physiology were slightly different between the two HHA and MHA Tibetan pigs in that RBC was a resulting parameter in the former and MCV in the latter. Correspondingly, on one

hand, the decreased RBC improved blood viscosity in HHA Tibetan pigs; on the other hand, the smaller MCV improved blood flow resistant and erythrocyte deformability in MHA Tibetan pigs. At this point, the corresponding findings to Tibetans were limited to insighting into hemoglobin concentration for *EPAS1* and *EGLN1* without detection of hemorheologic parameters. In fact, it seemed to be plausible that decreased RBC and smaller MCV, possibly affected by lowered hemoglobin level, were responsible for blunted erythropoiesis and improved blood viscosity as well as erythrocyte deformability.

In order to identify the regulatory effect of CGTG indel, mRNA and protein expression levels of *TMPRSS6* in HHA Tibetan pigs with DD and II genotype were determined by RT-qPCR and western-blot experiments. As expected, the CGTG deletion led to the lower expression level of protein and mRNA in *TMPRSS6*, suggesting that *HIF* could not bind to HRE of *TMPRSS6* gene in HHA Tibetan pigs with DD genotype under high-altitude hypoxic environment. The matriptase-2, *TMPRSS6* encoding protein, can be modulated by acute iron deprivation [76,77]. In rats under acute iron deprivation, matriptase-2 protein levels increased to suppress hepcidin production and increase iron level in the liver [76], suggesting a key role of matriptase-2 in the maintenance of tight systemic iron homeostasis. Furthermore, studies also demonstrated that *TMPRSS6* mRNA expression was upregulated by *HIF* in hypoxia [48,72,73]. Here, the CGTG deletion of *TMPRSS6* resulted in the loss of a HRE, which down-regulated *TMPRSS6* expression level and consequently induced the lower HGB and the smaller MCV underlying blunted erythropoiesis and improved

blood viscosity and erythrocyte deformability.

## Acknowledgments

The authors thank staff of the animal science and veterinary bureau of Shangri-la County for collections of Tibetan pig samples for this study.

## Author Contributions

Conceived and designed the experiments: XYK, HMM, XG. Performed the experiments: XYK, JHQ, JFY, QJ, XRL, BW, DWY, SXL. Analyzed the data: XYK, XXD. Wrote the paper: XYK, XXD, SLY.

## References

1. Li M, Tian S, Jin L, Zhou G, Li Y, Zhang Y, et al. Genomic analyses identify distinct patterns of selection in domesticated pigs and Tibetan wild boars. Nat Genet [Internet]. 2013;45(12):1431–8. Available from: <http://www.ncbi.nlm.nih.gov/pubmed/24162736><http://www.nature.com/doi/10.1038/ng.2811>
2. Ai H, Yang B, Li J, Xie X, Chen H, Ren J. Population history and genomic signatures for high-altitude adaptation in Tibetan pigs. BMC Genomics [Internet]. 2014;15(1):834. Available from: <http://www.pubmedcentral.nih.gov/articlerender.fcgi?artid=4197311&tool=pmcentrez&rendertype=abstract>
3. Dong K zhe, Kang Y, Yao N, Shu G tao, Zuo Q qing, Zhao Q jun, et al. Genetic Variation of EPAS1 Gene in Tibetan Pigs and Three Low-Altitude Pig Breeds in China. J Integr Agric.

2014;13(9):1990–8.

4. Sakai A, Matsumoto T, Saitoh M, Matsuzaki T, Koizumi T, Ishizaki T, et al. Cardiopulmonary Hemodynamics of Blue-Sheep, *Pseudois nayaur*, as High-Altitude Adapted Mammals. *Jpn J Physiol* [Internet]. 2003;53(5):377–84. Available from: <http://joi.jlc.jst.go.jp/JST.JSTAGE/jjphysiol/53.377?from=CrossRef>

5. Reeves JT, Leon-Velarde F. Chronic mountain sickness: recent studies of the relationship between hemoglobin concentration and oxygen transport. *High Alt Med Biol*. 2004;5(2):147.

6. Chen Y, Jiang C, Luo Y, Liu F, Gao Y. An EPAS1 Haplotype Is Associated With High Altitude Polycythemia in Male Han Chinese at the Qinghai-Tibetan Plateau. *Wilderness Environ Med* [Internet]. 2015;25(4):392–400. Available from: <http://dx.doi.org/10.1016/j.wem.2014.06.003>

7. Beall CM. Two routes to functional adaptation: Tibetan and Andean high-altitude natives. *Proc Natl Acad Sci U S A*. 2007;104(S1):8655–60.

8. Wu T, Wang XX, Wei C, Cheng H, Wang XX, Li Y, et al. Hemoglobin levels in Qinghai-Tibet: different effects of gender for Tibetans vs. Han. *J Appl Physiol* [Internet]. 2005;98(2):598–604. Available from: <http://www.ncbi.nlm.nih.gov/pubmed/15258131>

9. Wang W, Liu F, Zhang Z, Zhang Y, Fan X, Liu R, et al. The Growth Pattern of Tibetan Infants at High Altitudes: a Cohort Study in Rural Tibet region. *Sci Rep* [Internet]. 2016;6(6):34506. Available from: <http://dx.doi.org/10.1038/srep34506>

10. Qiu Q, Zhang G, Ma T, Qian W, Wang J, Ye Z, et al. The yak genome and adaptation to life at high altitude. *Nat Genet* [Internet]. 2012;44(8):946–9. Available from: <http://dx.doi.org/10.1038/ng.2343>

- 425 11. Wu X yun, Ding X zhi, Chu M, Guo X, Bao P jia, Liang C nian, et al. Novel SNP of EPAS1  
426 gene associated with higher hemoglobin concentration revealed the hypoxia adaptation of yak  
427 (*Bos grunniens*). *J Integr Agric* [Internet]. 2015;14(4):741–8. Available from:  
428 [http://dx.doi.org/10.1016/S2095-3119\(14\)60854-6](http://dx.doi.org/10.1016/S2095-3119(14)60854-6)
- 429 12. Sun J, Zhong H, Chen SY, Yao YG, Liu YP. Association between MT-CO3 haplotypes and  
430 high-altitude adaptation in Tibetan chicken. *Gene*. 2013;529(1):131–7.
- 431 13. Ge R-L, Cai Q, Shen Y-Y, San A, Ma L, Zhang YY-PY, et al. Draft genome sequence of the  
432 Tibetan antelope. *Nat Commun* [Internet]. 2013;4(May):1858. Available from:  
433 <http://dx.doi.org/10.1038/ncomms2860>
- 434 14. Ge RL, Kubo K, Kobayashi T, Sekiguchi M, Honda T. Blunted hypoxic pulmonary  
435 vasoconstrictive response in the rodent *Ochotona curzoniae* (pika) at high altitude. *Am J*  
436 *Physiol*. 1998;274:H1792–9.
- 437 15. Dong K, Yao N, Pu Y, He X, Zhao Q, Luan Y, et al. Genomic scan reveals loci under altitude  
438 adaptation in Tibetan and Dahe pigs. *PLoS One*. 2014;9(10):1–11.
- 439 16. Storz JF, Sabatino SJ, Hoffmann FG, Gering EJ, Moriyama H, Ferrand N, et al. The molecular  
440 basis of high-altitude adaptaion in deer mice. *Plos Genet*. 2007;3(3):e45.
- 441 17. Basang Z, Wang B, Li L, Yang L, Liu L, Cui C, et al. HIF2A variants were associated with  
442 different levels of high-altitude hypoxia among native tibetans. *PLoS One*. 2015;10(9):1–13.
- 443 18. Bigham AW, Mao X, Mei R, Brutsaert T, Wilson MJ, Julian CG, et al. Identifying positive  
444 selection candidate loci for high-altitude adaptation in Andean populations. *Hum Genomics*  
445 [Internet]. 2009;4(2):79–90. Available from:  
446 <http://www.humgenomics.com/content/4/2/79%5Cnhttp://www.ncbi.nlm.nih.gov/pubmed/200>

38496%5Cnhttp://www.pubmedcentral.nih.gov/articlerender.fcgi?artid=PMC2857381

19. Gou X, Wang Z, Li N, Qiu F, Xu Z, Yan D, et al. Whole-genome sequencing of six dog breeds from continuous altitudes reveals adaptation to high-altitude hypoxia. *Genome Res.* 2014;24(8):1308–15.

20. Simonson TS, Huff CD, Witherspoon DJ, Prchal JT, Jorde LB. Adaptive genetic changes related to haemoglobin concentration in native high-altitude Tibetans. *Exp Physiol* [Internet]. 2015;100(11):1263–8. Available from: <http://doi.wiley.com/10.1113/EP085035>

21. Simonson TS, Wagner PD. Oxygen transport adaptations to exercise in native highland populations. *Exp Physiol* [Internet]. 2015;100(11):1231–2. Available from: <http://doi.wiley.com/10.1113/EP085073>

22. Simonson TS, Yang Y, Huff CD, Yun H, Qin G, Witherspoon DJ, et al. Genetic evidence for high-altitude adaptation in Tibet. *Science* (80- ) [Internet]. 2010;329(5987):72–5. Available from: <http://www.ncbi.nlm.nih.gov/pubmed/20466884>

23. Fan R, Liub F, Wua H, Wub S, Zhub C, Lib Y, et al. A Positive Correlation between Elevated Altitude and Frequency of Mutant Alleles at the EPAS1 and HBB Loci in Chinese Indigenous Dogs. *J Genet Genomics.* 2015;42:173–7.

24. Lou H, Lu Y, Lu D, Fu R, Wang X, Feng Q, et al. A 3.4-kb Copy-Number Deletion near EPAS1 Is Significantly Enriched in High-Altitude Tibetans but Absent from the Denisovan Sequence. *Am J Hum Genet* [Internet]. 2015;97(1):54–66. Available from: <http://dx.doi.org/10.1016/j.ajhg.2015.05.005>

25. Beall CM, Cavalleri GL, Deng L, Elston RC, Gao Y, Knight J, et al. Natural selection on EPAS1 (HIF2 ) associated with low hemoglobin concentration in Tibetan highlanders. *Proc*

469 Natl Acad Sci [Internet]. 2010;107(25):11459–64. Available from:

470 <http://www.pnas.org/cgi/doi/10.1073/pnas.1002443107>

471 26. Rankin EB, Biju MP, Liu Q, Unger TL, Rha J, Johnson RS, et al. Hypoxia-inducible factor-2  
472 (HIF-2) regulates hepatic erythropoietin in vivo. *J Clin Invest*. 2007;117(4):1068–77.

473 27. Melanie J. Percy, , Yu Jin Chung, , Claire Harrison, , Jane Mercieca, , A. Victor  
474 Hoffbrand, , Paulo C.J.L. Santos, , et al. Two new mutations in the HIF2A gene associated  
475 with erythrocytosis. Vol. 87, *American Journal of Hematology*. 2012. p. 439–41.

476 28. Nie N, Shi J, Shao Y, Li X, Ge M, Huang J, et al. A novel tri-allelic mutation of TMPRSS6 in  
477 iron-refractory iron deficiency anaemia with response to glucocorticoid. *Br J Haematol*.  
478 2014;166(2):292–308.

479 29. Gichohi-Wainaina, W. N. Melse-Boonstra, A. Swinkels, D. W. Zimmermann, M. B. Feskens, E.  
480 J. Towers GW, Wanjiku N Gichohi-Wainaina, AlidaMelse-Boonstra, Dorine WSwinkels,  
481 Michael B Zimmermann, Edith J Feskens and GWT, Gichohi-Wainaina, W. N.  
482 Melse-Boonstra, A. Swinkels, D. W. Zimmermann, M. B. Feskens, E. J. Towers GW. Common  
483 variants and haplotypes in the TF, TNF- alpha , and TMPRSS6 genes are associated with iron  
484 status in a female black South. *J Nutr* 2015. 2015;145(5):945–53.

485 30. Guillem F, Lawson S, Kannengiesser C, Westerman M, Beaumont C, Grandchamp B. Two  
486 nonsense mutations in the TMPRSS6 gene in a patient with microcytic anemia and iron  
487 deficiency. *Blood*. 2008;112(5):2089–91.

488 31. Frýdlová J, Pøikryl P, Truksa J, Falke LL, Du X, Gurieva I, et al. Effect of Erythropoietin, Iron  
489 Deficiency and Iron Overload on Liver Matriptase-2 (TMPRSS6) Protein Content in Mice and  
490 Rats. *PLoS One*. 2016;11(2):1–18.



491 32. Yaisha HM, Farrell CP, Robert D. Christensen BCM, Jackson LK, Trochez-Enciso J, Kaplan J,  
492 et al. Two novel mutations in TMPRSS6 associated with iron-refractory iron deficiency anemia  
493 in a mother and child. *Blood Cells Mol Dis.* 2017;65:38–40.

494 33. E. Beutler, C. Van Geet, D.M.W.M. te Loo, T. Gelbart, K. Crain, J Truksa and P. L, Geet C  
495 Van, Loo DMWM te, Gelbart T, Crain K, Truksa J, et al. Polymorphisms and Mutations of  
496 Human TMPRSS6 in Iron Deficiency Anemia. *Blood Cells Mol Dis.* 2011;44(1):1–15.

497 34. Gichohi-Wainaina, W. N. Melse-Boonstra, A. Swinkels, D. W. Zimmermann, M. B. Feskens, E.  
498 J. Towers GW. Common Variants and Haplotypes in the TF, TNF- $\alpha$ , and TMPRSS6 Genes Are  
499 Associated with Iron Status in a Female Black South African Population. *J Nutr* 2015.  
500 2015;145(5):945–53.

501 35. Wang CY, Meynard D, Lin HY. The role of TMPRSS6/matrilysin-2 in iron regulation and  
502 anemia. *Front Pharmacol.* 2014;5 MAY(May):1–6.

503 36. Xiong Y, Wu Z, Yang W, Zhao X, Peng G, Tang K, et al. A novel splicing mutation of  
504 TMPRSS6 in a Chinese child with iron-refractory iron deficiency anaemia. *Br J Haematol.*  
505 2015;171(4):647–9.

506 37. De Falco L, Totaro F, Nai A, Pagani A, Girelli D, Silvestri L, et al. Novel TMPRSS6 mutations  
507 associated with Iron-refractory Iron Deficiency Anemia (IRIDA). *Hum Mutat.* 2010;31(5).

508 38. Benjamin B, Ferreira MARR, Willemsen G, Gordon S, Middelberg RPSS, McEvoy BP, et al.  
509 Common variants in TMPRSS6 are associated with iron status and erythrocyte volume. *Nat*  
510 *Genet [Internet].* 2009;41(11):1173–5. Available from:  
511 <http://www.nature.com/doi/10.1038/ng.456>

512 39. Traglia M, Girelli D, Biino G, Campostrini N, Corbella M, Sala C, et al. Association of HFE

513 and TMPRSS6 genetic variants with iron and erythrocyte parameters is only in part dependent  
514 on serum hepcidin concentrations. J Med Genet [Internet]. 2011;48(9):629–34. Available from:  
515 <http://www.ncbi.nlm.nih.gov/pubmed/21785125>

516 40. Schmidt PJ, Liu K, Visner G, Fitzgerald K, Fishman S, Racie T, et al. RNAi-mediated  
517 reduction of hepatic Tmprss6 diminishes anemia and secondary iron overload in a  
518 splenectomized mouse model of  $\beta$ -thalassemia intermedia. Am J Hematol [Internet]. 2018;  
519 Available from: <http://onlinelibrary.wiley.com/resolve/doi?DOI=10.1002/ajh.25079>

520 41. Sal E, Keskin EY, Yenicesu I, Bruno M, De Falco L. Iron-refractory iron deficiency anemia  
521 (IRIDA) cases with 2 novel *TMPRSS6* mutations. Pediatr Hematol Oncol [Internet].  
522 2016;33(3):226–32. Available from:  
523 <http://www.tandfonline.com/doi/full/10.3109/08880018.2016.1157229>

524 42. Kodama K, Noguchi A, Adachi H, Hebiguchi M, Yano M, Takahashi T. Novel mutation in the  
525 *TMPRSS6* gene with iron-refractory iron deficiency anemia. Pediatr Int. 2014;56(4):e41–4.

526 43. Capra AP, Ferro E, Cannavò L, La Rosa MA, Zirilli G. A child with severe iron-deficiency  
527 anemia and a complex *TMPRSS6* genotype. Hematology. 2017;22(9):559–64.

528 44. Chambers JC, Zhang W, Li Y, Sehmi J, Wass MN, Zabaneh D, et al. Genome-wide association  
529 study identifies variants in *TMPRSS6* associated with hemoglobin levels. Nat Genet [Internet].  
530 2009;41(11):1170–2. Available from: <http://www.nature.com/doi/10.1038/ng.462>

531 45. Tanaka T, Roy CNC, Yao W, Matteini A, Semba RD, Arking D, et al. A genome-wide  
532 association analysis of serum iron concentrations. Blood [Internet]. 2010;115(1):94–6.  
533 Available from:  
534 <http://www.ncbi.nlm.nih.gov/pubmed/19880490><http://www.pubmedcentral.nih.gov/articl>

erender.fcgi?artid=PMC2803694

46. Soranzo N, Spector TD, Mangino M, Kühnel B, Rendon A, Teumer A, et al. A genome-wide meta-analysis identifies 22 loci associated with eight hematological parameters in the HaemGen consortium. *Nat Genet* [Internet]. 2009;41(11):1182–90. Available from: <http://www.ncbi.nlm.nih.gov/pubmed/19820697><http://www.pubmedcentral.nih.gov/articlerender.fcgi?artid=PMC3108459>

47. Du X, She E, Gelbart T, Truksa J, Lee P, Xia Y, et al. Required to Sense Iron Deficiency. *Science* (80- ) [Internet]. 2008;1088(May):1088–92. Available from: <http://www.pubmedcentral.nih.gov/articlerender.fcgi?artid=2430097&tool=pmcentrez&rendertype=abstract>

48. Meynard D, Sun CC, Wu Q, Chen W, Chen S, Nelson CN, et al. Inflammation regulates TMPRSS6 expression via STAT5. *PLoS One*. 2013;8(12).

49. Rausa M, Ghitti M, Pagani A, Nai A, Campanella A, Musco G, et al. Identification of TMPRSS6 cleavage sites of hemojuvelin. *J Cell Mol Med*. 2015;19(4):879–88.

50. Gan W, Guan Y, Wu Q, An P, Zhu J, Lu L, et al. Association of TMPRSS6 polymorphisms with ferritin, hemoglobin, and type 2 diabetes risk in a Chinese Han population. *Am Soc Nutr*. 2012;626–32.

51. Finberg KE, Heeney MM, Campagna DR, Aydınok Y. Mutations in TMPRSS6 cause iron-refractory iron deficiency anemia (IRIDA). *Nat Genet*. 2008;40(5):569–71.

52. Nie N, Shi J, Shao Y, Li X, Ge M, Huang J, et al. A novel tri-allelic mutation of TMPRSS6 in iron-refractory iron deficiency anaemia with response to glucocorticoid. *Vol. 166, British Journal of Haematology*. 2014. p. 300–3.

557 53. E. Beutler, C. Van Geet, D.M.W.M. te Loo, T. Gelbart, K. Crain, J Truksa and P. L. Beutler  
558 E, Van Geet C, te Loo DMWM, Gelbart T, Crain K, et al. Polymorphisms and Mutations of  
559 Human TMPRSS6 in Iron Deficiency Anemia. Blood Cells, Mol Dis. 2010;44(1):16–21.

560 54. C. C. Constantine, Anderson GJ, C. D. Vulpe, C. E. McLaren, M. Bahlo, H. L. Yeap. A novel  
561 association between a SNP in CYBRD1 and serum ferritin levels in a cohort study of HFE  
562 Hereditary Haemochromatosis. Br J Haematol [Internet]. 2010 Jan 15;44(1):1–18. Available  
563 from: <http://linkinghub.elsevier.com/retrieve/pii/S1079979609001685>

564 55. Du X, She E, Gelbart T, Truksa J, Lee P, Xia Y, et al. The Serine Protease TMPRSS6 Is  
565 Required to Sense Iron Deficiency. Science (80- ) [Internet]. 2008;320(5879):1088–92.  
566 Available from:  
567 <http://www.ncbi.nlm.nih.gov/pubmed/18451267>  
568 <http://www.pubmedcentral.nih.gov/articlerender.fcgi?artid=PMC2430097>

569 56. Danquah I, Gahutu JB, Zeile I, Musemakweri A, Mockenhaupt FP. Anaemia, iron deficiency  
570 and a common polymorphism of iron-regulation, TMPRSS6 rs855791, in rwandan children.  
571 Trop Med Int Heal. 2014;19(1):117–22.

572 57. Kumar S, Stecher G, Tamura K. MEGA7: Molecular Evolutionary Genetics Analysis Version  
573 7.0 for Bigger Datasets. Mol Biol Evol. 2016;33(7):1870–4.

574 58. Barrett JC, Fry B, Maller J, Daly MJ. Haploview: Analysis and visualization of LD and  
575 haplotype maps. Bioinformatics. 2005;21(2):263–5.

576 59. Zhang B, Qiangba Y, Shang P, Lu Y, Yang Y, Wang Z, et al. Gene expression of vascular  
577 endothelial growth factor A and hypoxic adaptation in Tibetan pig. J Anim Sci Biotechnol  
578 [Internet]. 2016;7:21. Available from:

579 <http://dx.doi.org/10.1186/s40104-016-0082-z>5Cn<http://www.ncbi.nlm.nih.gov/pubmed/2704>

580 2296%5Cn<http://www.pubmedcentral.nih.gov/articlerender.fcgi?artid=PMC4818941>

581 60. Tao C, Wang W, Zhou P, Xia T, Zhou X, Zeng C, et al. Molecular characterization , expression

582 profiles , and association analysis with hematologic parameters of the porcine HPSE Molecular

583 characterization , expression profiles , and association. J Appl Genet. 2013;54(February

584 2016):71–8.

585 61. Camenisch G, Stroka D, Gassmann M, Wenger R. Attenuation of HIF-1 DNA-binding activity

586 limits hypoxia-inducible endothelin-1 expression. Pflugers Arch Eur J Physiol.

587 2001;443(2):240–9.

588 62. Velasco G, Cal S, Quesada V, Sánchez LM, López-Otín C. Matriptase-2, a membrane-bound

589 mosaic serine proteinase predominantly expressed in human liver and showing degrading

590 activity against extracellular matrix proteins. J Biol Chem. 2002;277(40):37637–46.

591 63. Swenson ER, Bärtsch P. High-Altitude Pulmonary Edema. Compr Physiol [Internet].

592 2012;2(October):2753–73. Available from: <http://doi.wiley.com/10.1002/cphy.c100029>

593 64. Liu C, Zhang LF, Song ML, Bao HG, Zhao CJ, Li N. Highly efficient dissociation of oxygen

594 from hemoglobin in Tibetan chicken embryos compared with lowland chicken embryos

595 incubated in hypoxia. Poult Sci [Internet]. 2009;88(12):2689–94. Available from:

596 <http://www.ncbi.nlm.nih.gov/pubmed/19903969>

597 65. Cheviron ZA, Brumfield RT. Genomic insights into adaptation to high-altitude environments

598 [Internet]. Vol. 108, Heredity. Nature Publishing Group; 2012. p. 354–61. Available from:

599 <http://dx.doi.org/10.1038/hdy.2011.85>

600 66. Xia M, Chao Y, Jia J, Li C, Kong Q, Zhao Y, et al. Changes of hemoglobin expression in

601 response to hypoxia in a Tibetan schizothoracine fish, *Schizopygopsis pylzovi*. *J Comp Physiol*

602 *B Biochem Syst Environ Physiol* [Internet]. 2016;186(8):1033–43. Available from:

603 <http://link.springer.com/10.1007/s00360-016-1013-1>

604 67. Wuren T, Simonson TS, Wei G, Wagner HE, Wuren T, Qin G, et al. Low hemoglobin

605 concentration in Tibetan males is associated with greater high-altitude exercise capacity. *J*

606 *Physiol* [Internet]. 2015;14(October 2015):1–27. Available from:

607 <http://www.ncbi.nlm.nih.gov/pubmed/25988759>

608 68. Liu GH, Zhou DH, Cong W, Zhang XX, Shi XC, Danba C, et al. First report of seroprevalence

609 of swine influenza a virus in Tibetan pigs in Tibet, China. *Trop Anim Health Prod*.

610 2014;46(1):257–9.

611 69. Pichler I, Minelli C, Sanna S, Tanaka T, Schwienbacher C, Naitza S, et al. Identification of a

612 common variant in the TFR2 gene implicated in the physiological regulation of serum iron

613 levels. *Hum Mol Genet*. 2011;20(6):1232–40.

614 70. Ganesh SK, Zakai NA, van Rooij FJA, Soranzo N, Smith A V, Nalls MA, et al. Multiple loci

615 influence erythrocyte phenotypes in the CHARGE Consortium. *Nat Genet* [Internet].

616 2009;41(11):1191–8. Available from: <http://dx.doi.org/10.1038/ng.466>

617 71. Wang GL, Semenzas GL. Characterization of Hypoxia-inducible Factor 1 and Regulation of

618 DNA Binding Activity by Hypoxia \*. *J Biol Chem*. 1993;268(29):21513–8.

619 72. Beall CM, Cavalleri GL, Deng L, Elston RC, Gao Y, Knight JJ, et al. Natural selection on

620 EPAS1 (HIF2 ) associated with low hemoglobin concentration in Tibetan highlanders. *Proc*

621 *Natl Acad Sci* [Internet]. 2010;107(25):11459–64. Available from:

622 <http://www.pnas.org/cgi/doi/10.1073/pnas.1002443107>

- 623 73. Xiang K, Ouzhuluobu, Peng Y, Yang Z, Zhang X, Cui C, et al. Identification of a  
624 Tibetan-specific mutation in the hypoxic gene EGLN1 and its contribution to high-altitude  
625 adaptation. *Mol Biol Evol.* 2013;30(8):1889–98.
- 626 74. Lorenzo FR, Huff C, Myllymaki M, Olenchock B, Swierczek S, Tashi T, et al. A genetic  
627 mechanism for Tibetan high-altitude adaptation. *Nat Genet* [Internet]. 2014;46(9):951–6.  
628 Available from: <http://www.ncbi.nlm.nih.gov/pubmed/25129147>
- 629 75. Peng Y, Yang Z, Zhang H, Cui C, Qi X, Luo X, et al. Genetic variations in tibetan populations  
630 and high-altitude adaptation at the Himalayas. *Mol Biol Evol.* 2011;28(2):1075–81.
- 631 76. Zhang AS, Anderson SA, Wang J, Yang F, DeMaster K, Ahmed R, et al. Suppression of  
632 hepatic hepcidin expression in response to acute iron deprivation is associated with an increase  
633 of matriptase-2 protein. *Blood.* 2011;117(5):1687–899.
- 634 77. Meynard D, Vaja V, Sun CC, Corradini E, Chen S, López-Otín C, et al. Regulation of  
635 TMPRSS6 by BMP6 and iron in human cells and mice. *Blood.* 2011;118(3):747–56.
- 636 78. Maurer E, Gütschow M, Stirnberg M. Matriptase-2 (TMPRSS6) is directly up-regulated by  
637 hypoxia inducible factor-1: Identification of a hypoxia-responsive element in the TMPRSS6  
638 promoter region. *Biol Chem.* 2012;393(6):535–40.
- 639 79. Lakhal S, Scho J, Pugh ARMTWC, Ratcliffe PJ, Mole DR. Regulation of type II  
640 transmembrane serine proteinase TMPRSS6 by hypoxia-inducible factors: New link between  
641 hypoxia signaling and iron homeostasis. *J Biol Chem.* 2011;286(6):4090–7.

## 642 **Supporting information**

### 643 **S1 Table. Sample of Blood DNA extraction**

644     **S2 Table. Sample of Blood physiological index Determination**

645     **S3 Table. Primer pairs information for detecting SNPs in coding region and intron in this**

646     **study**

647     **S4 Table. Genotype frequency and allele frequency of the 16 SNPs in continuous altitudes**

648     **pig populations**

649     **S5 Table. Associations between CGTG insert/deletion and hematologic parameters in LHA**

650     **pig populations**

651     **S6 Table. Associations between CGTG insert/deletion and hematologic parameters in MA**

652     **pig populations**

653     **S7 Table. Associations between CGTG insert/deletion and hematologic parameters in LA**

654     **pig populations**



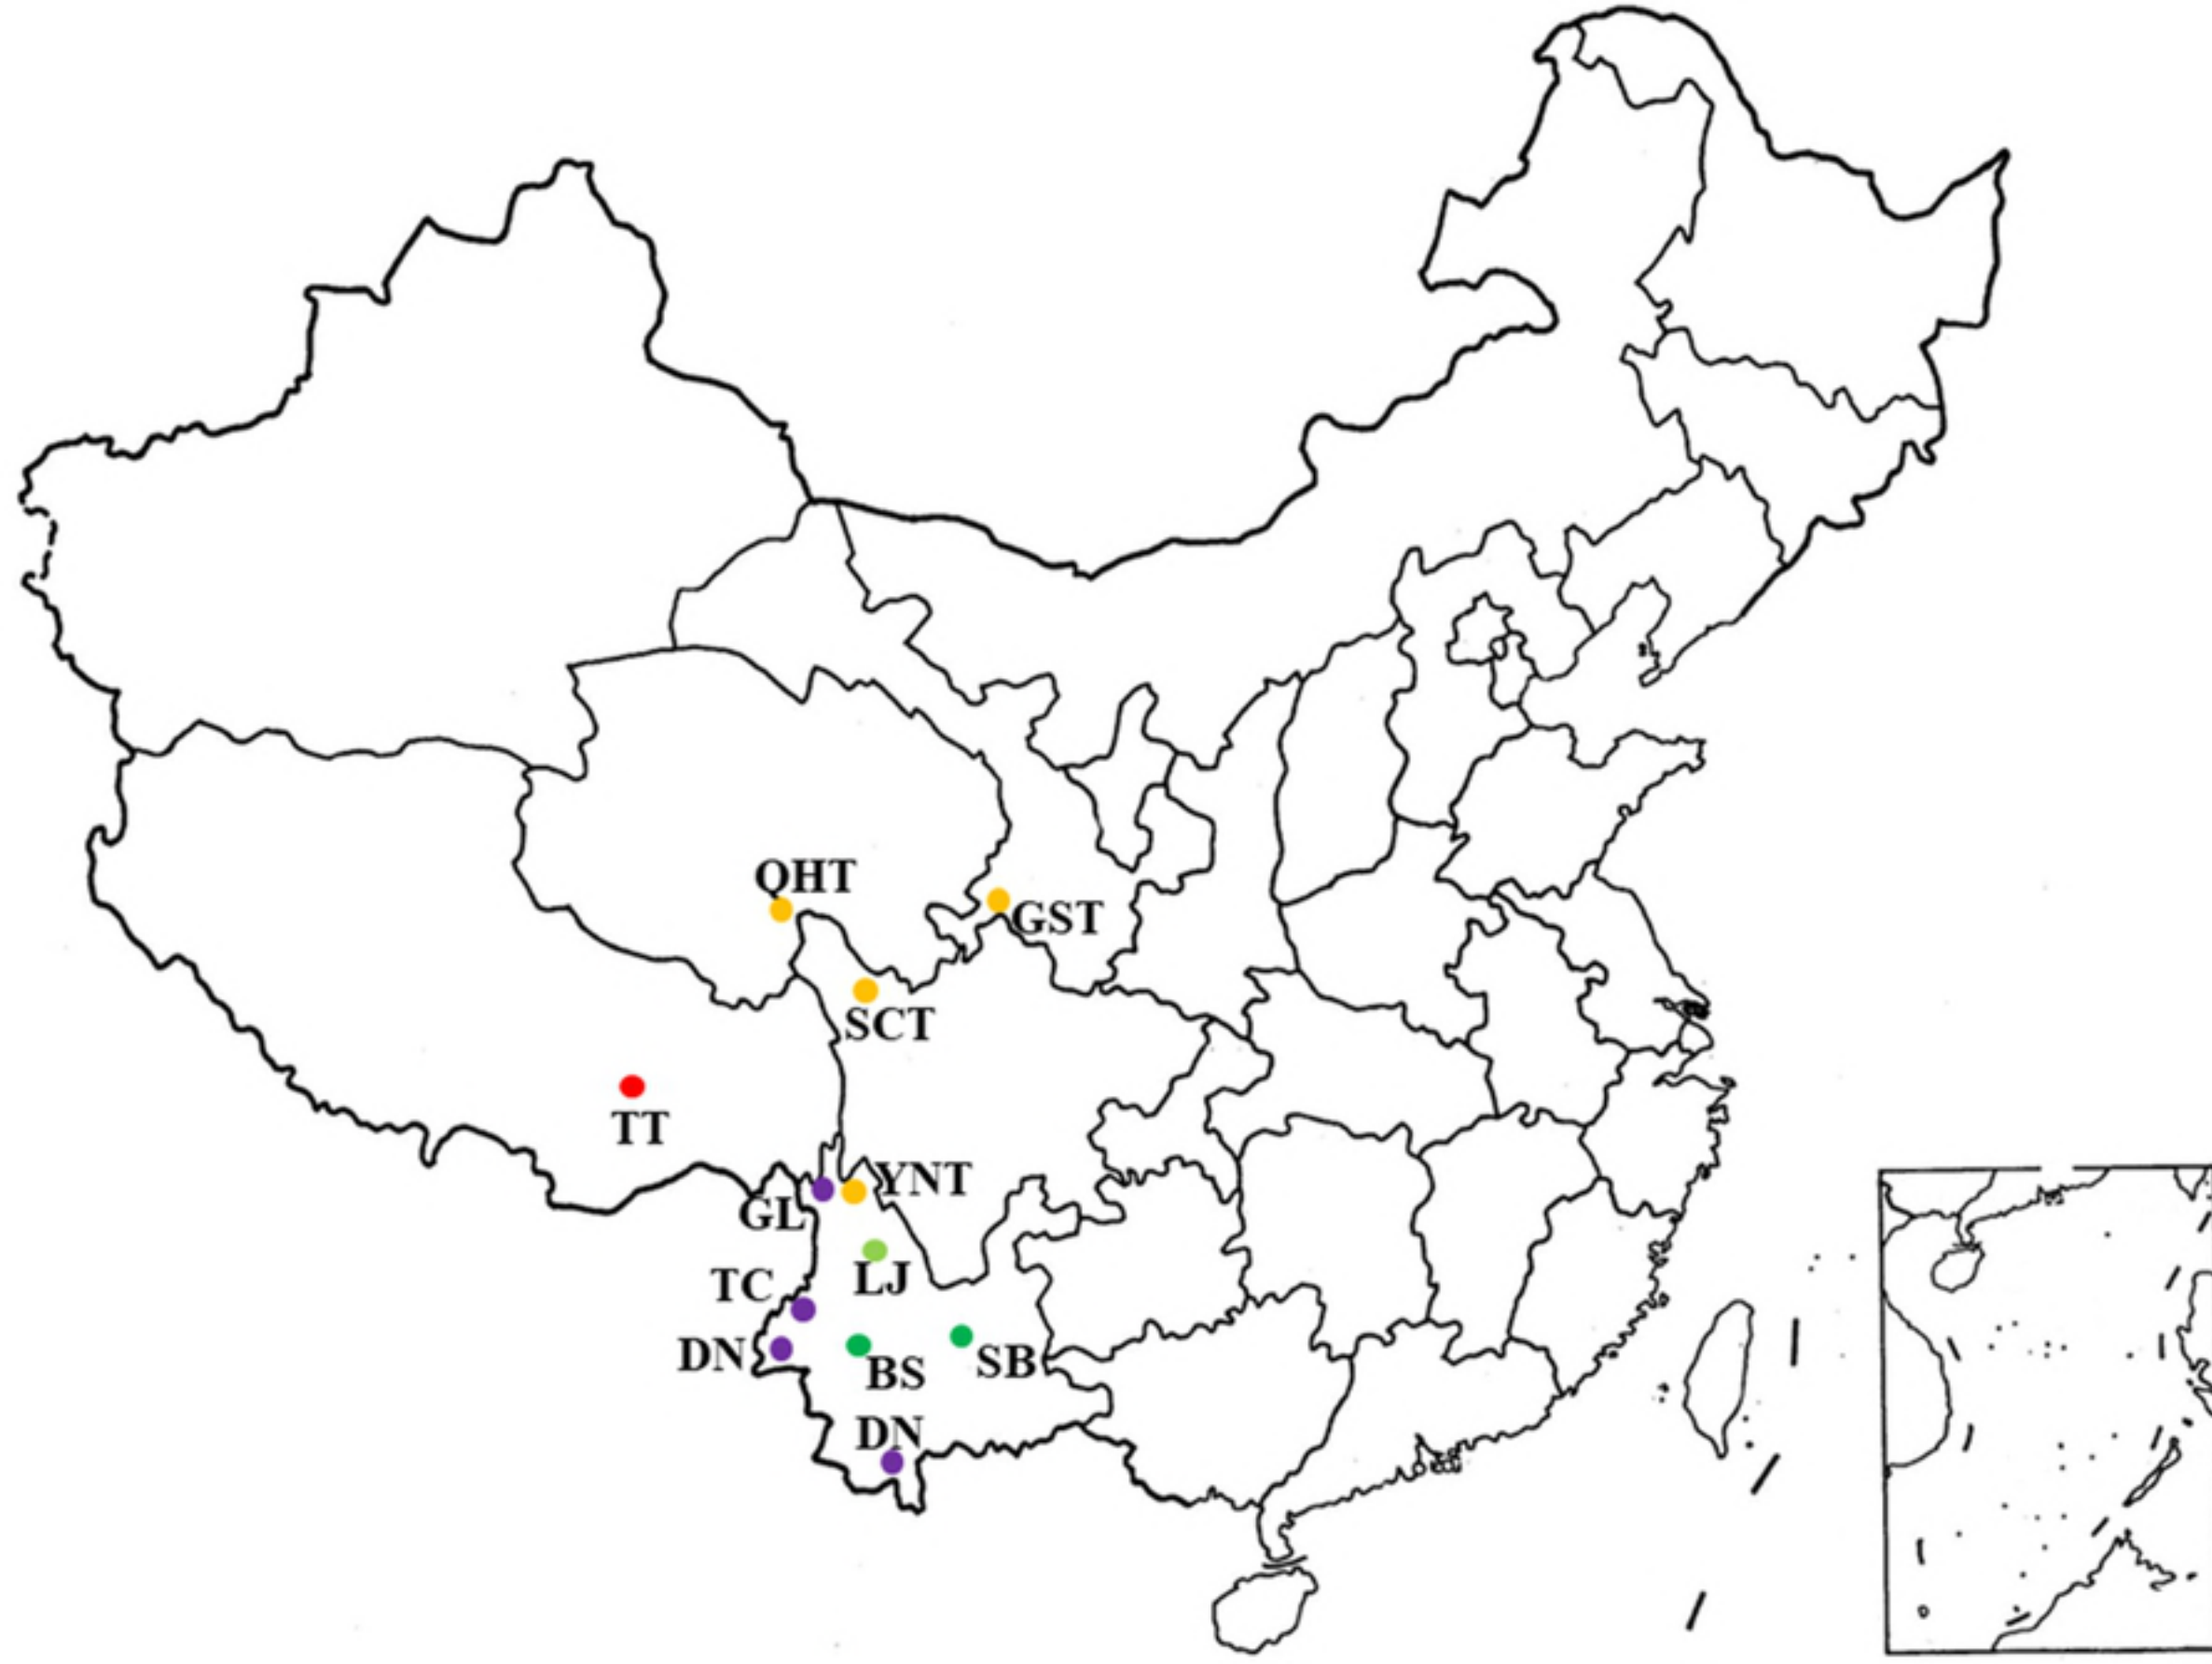



**A**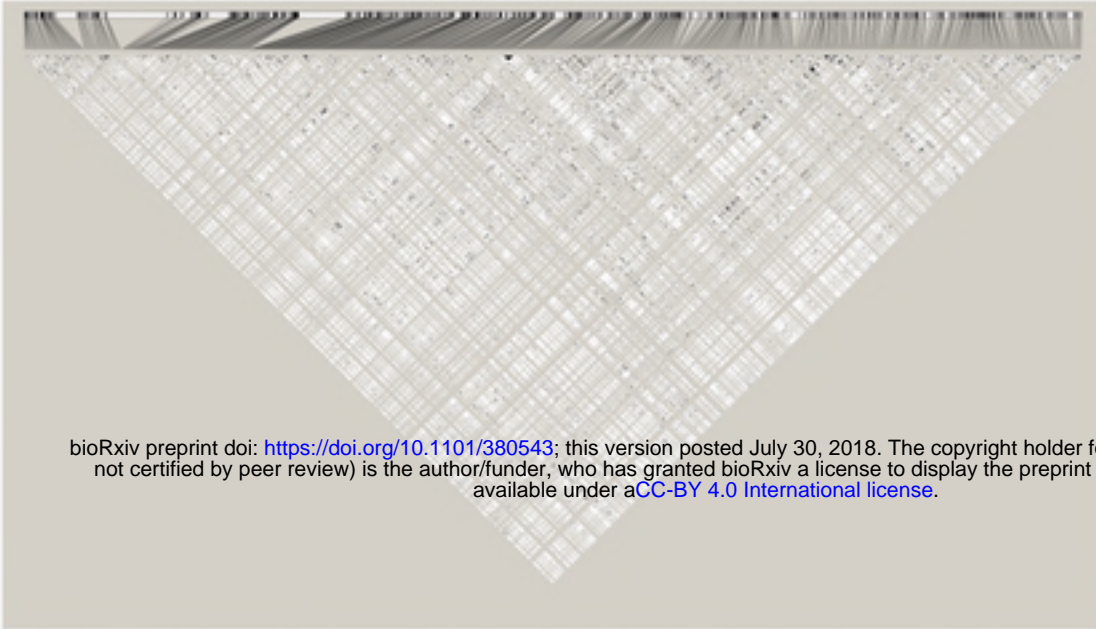**B**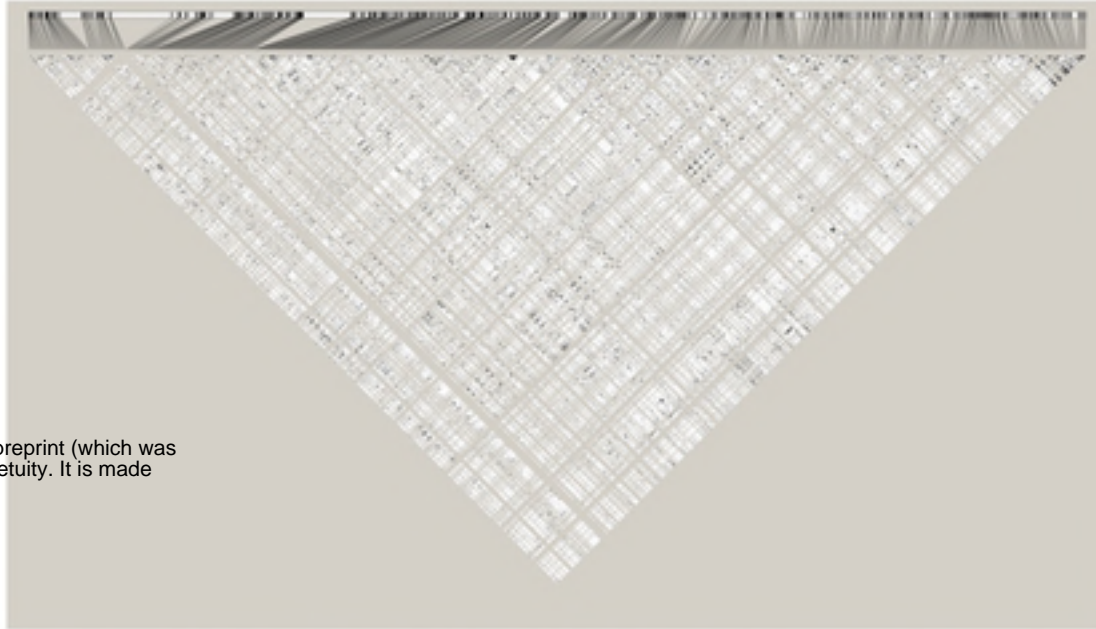**C**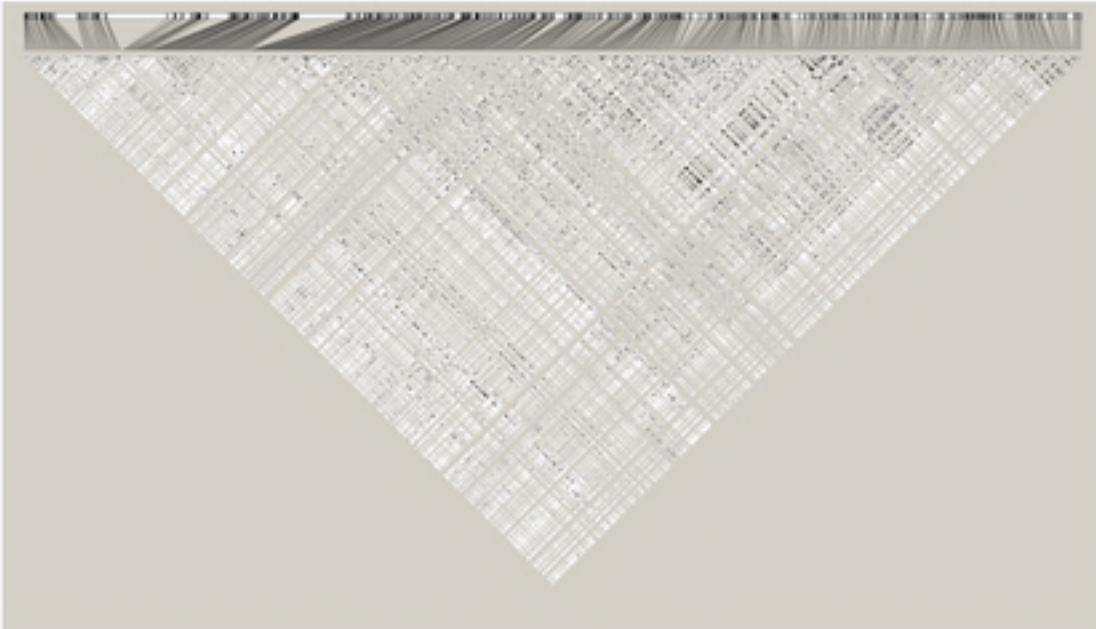**D**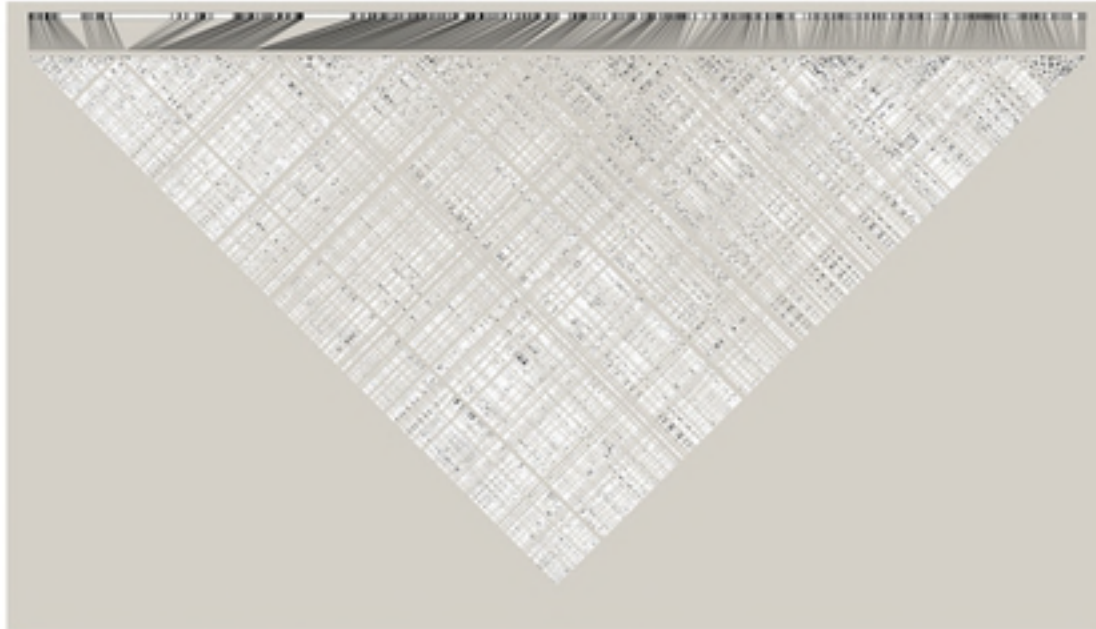**E**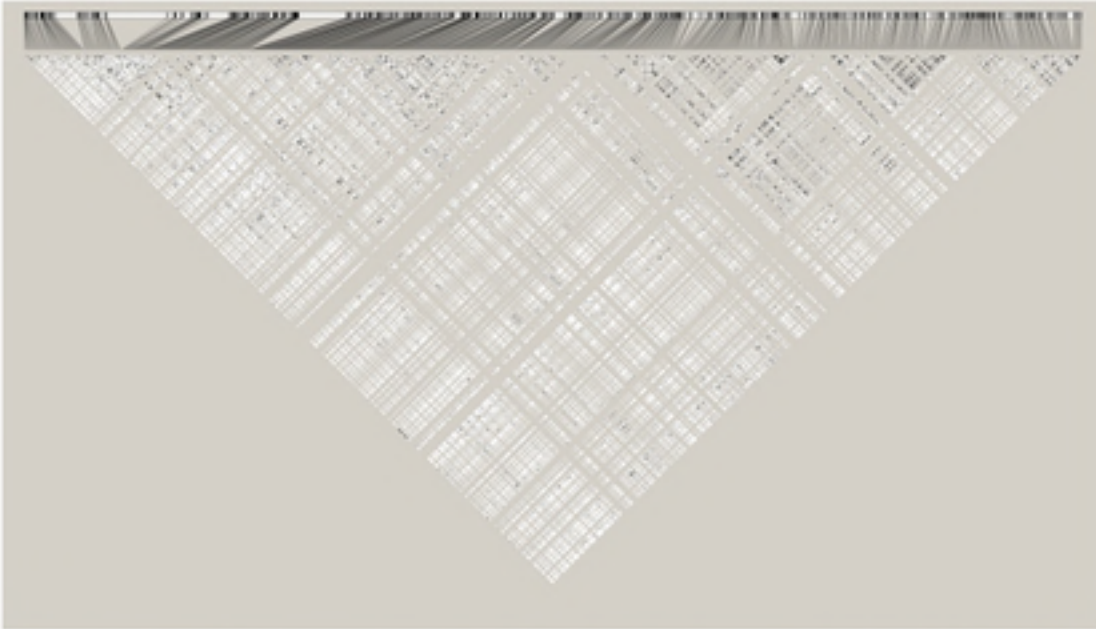**F**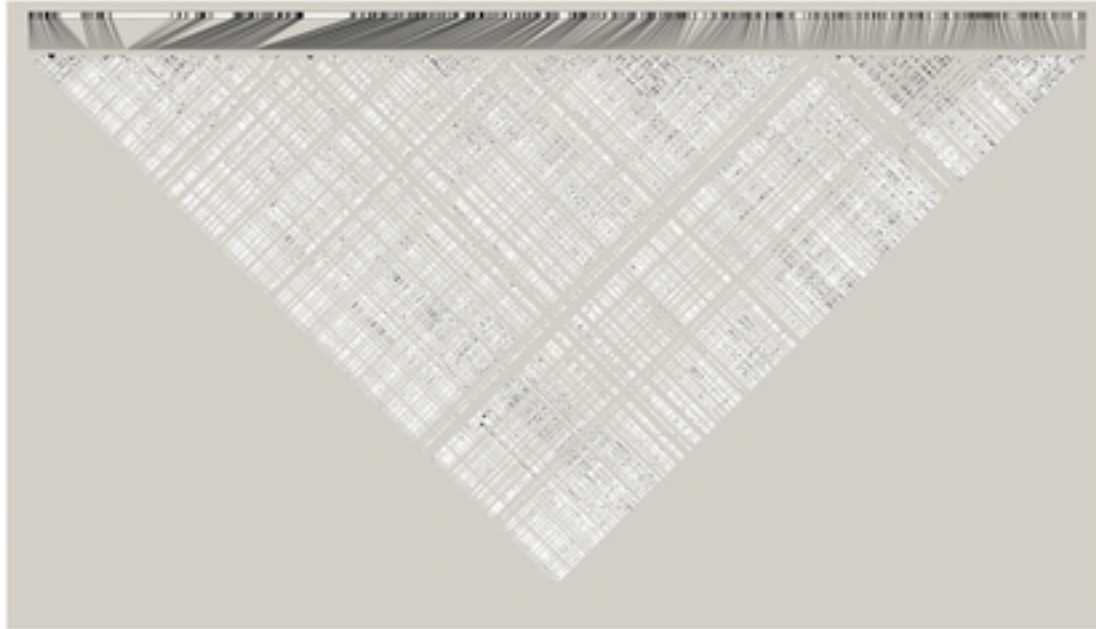**G**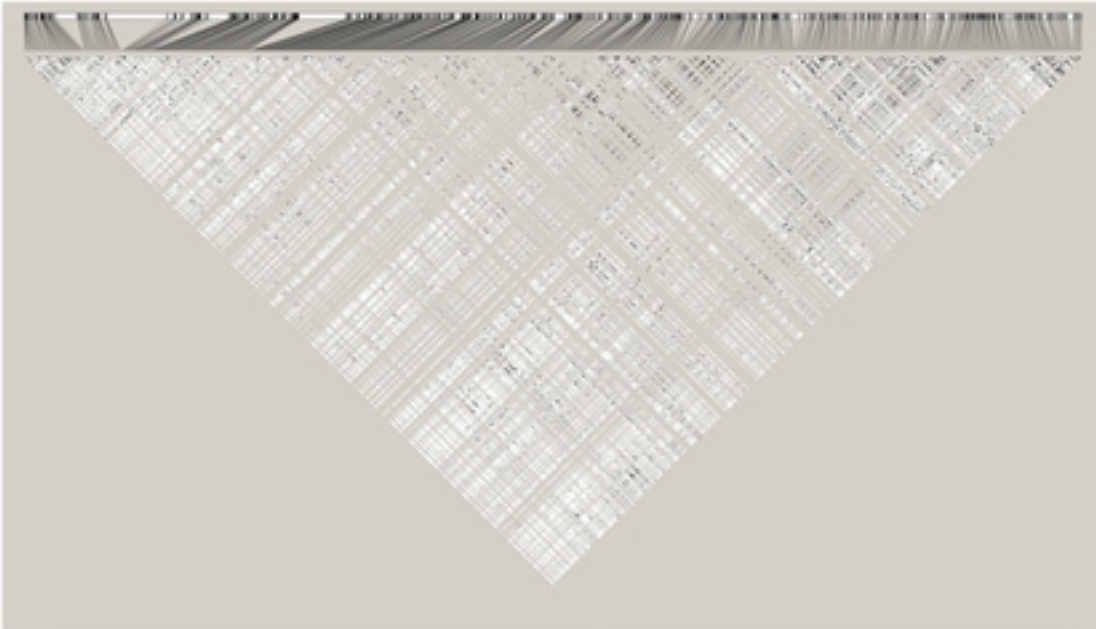**H**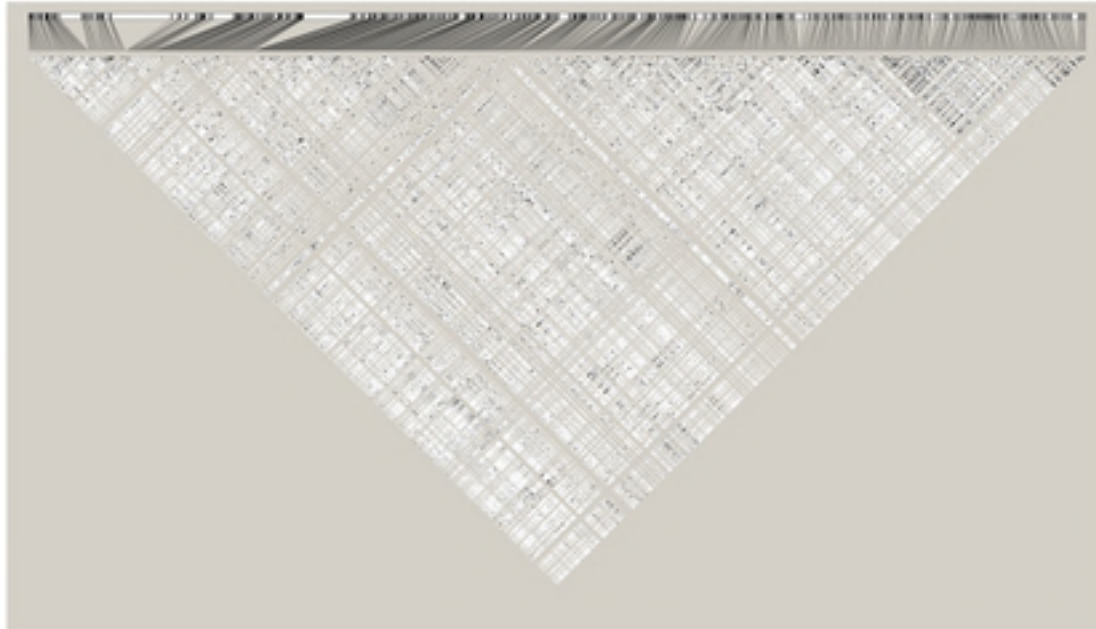

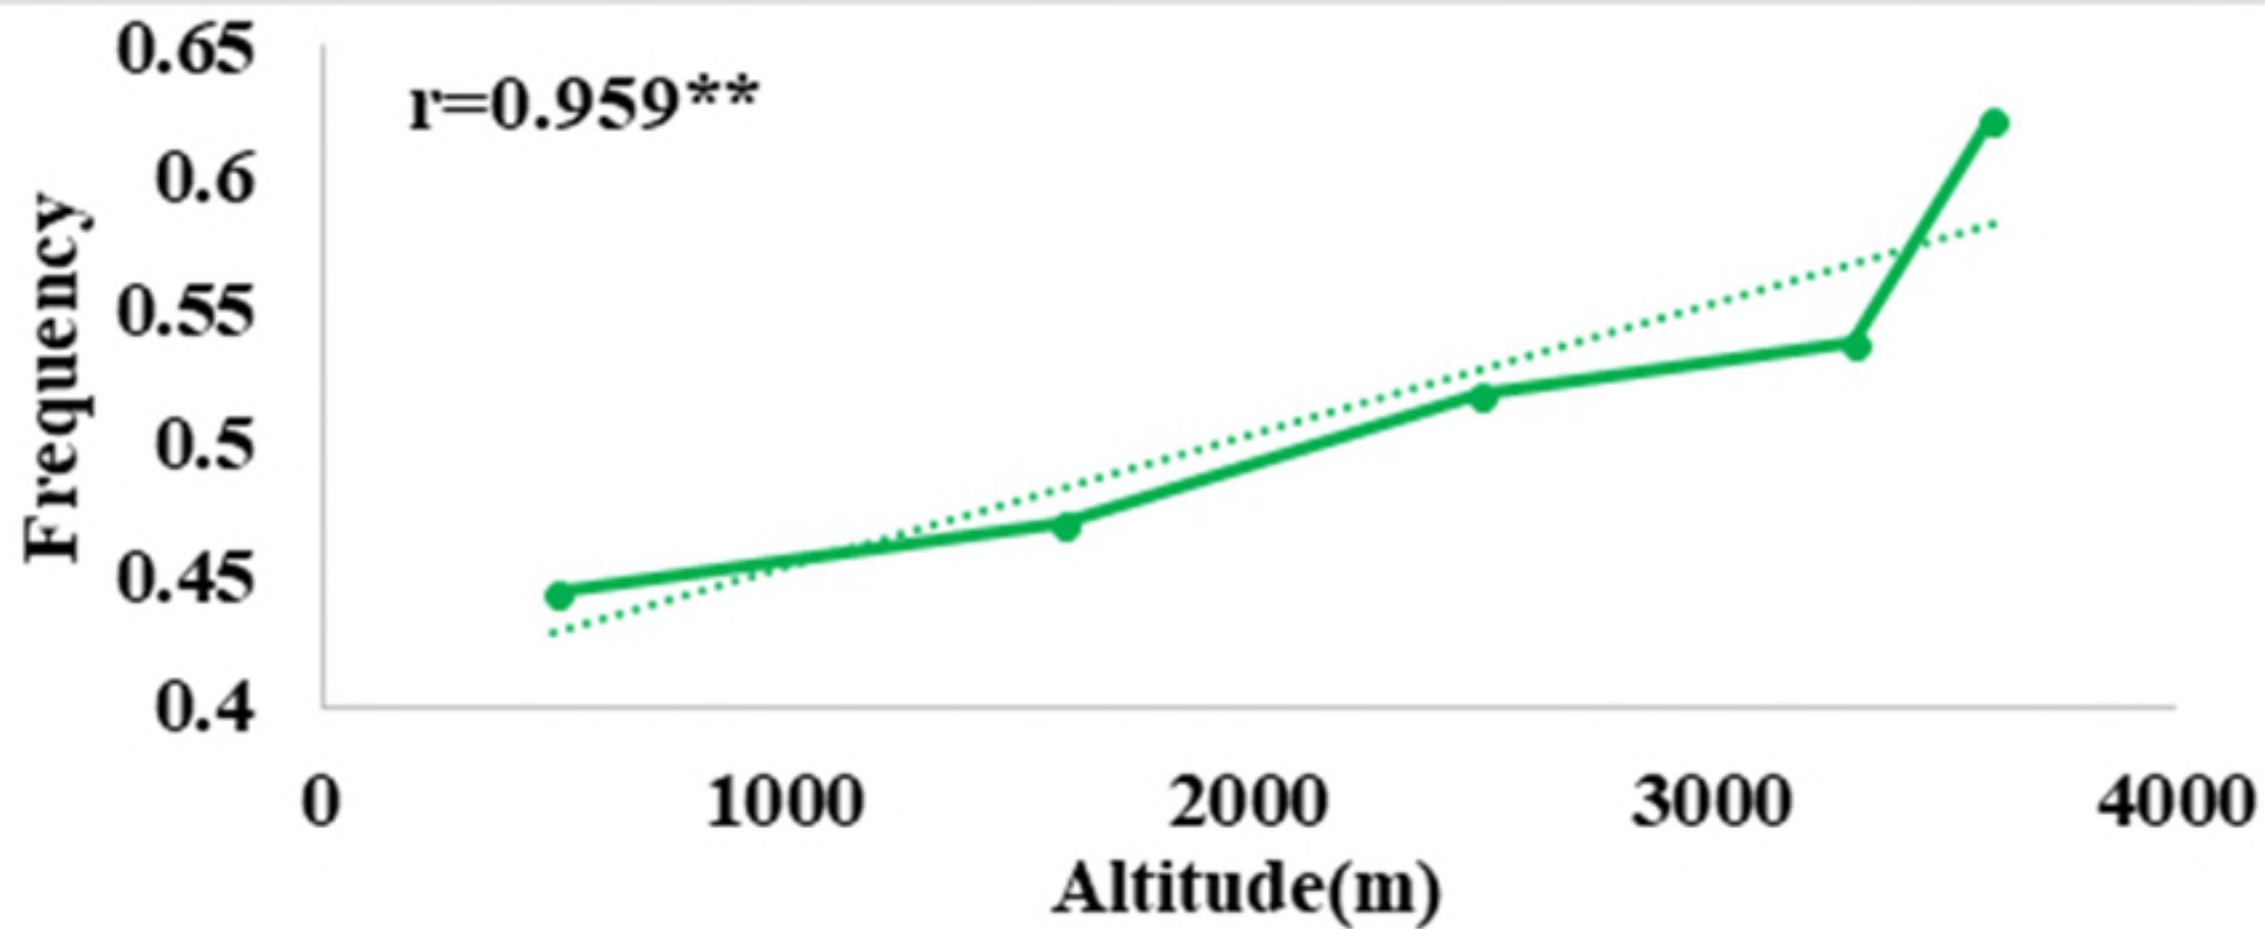



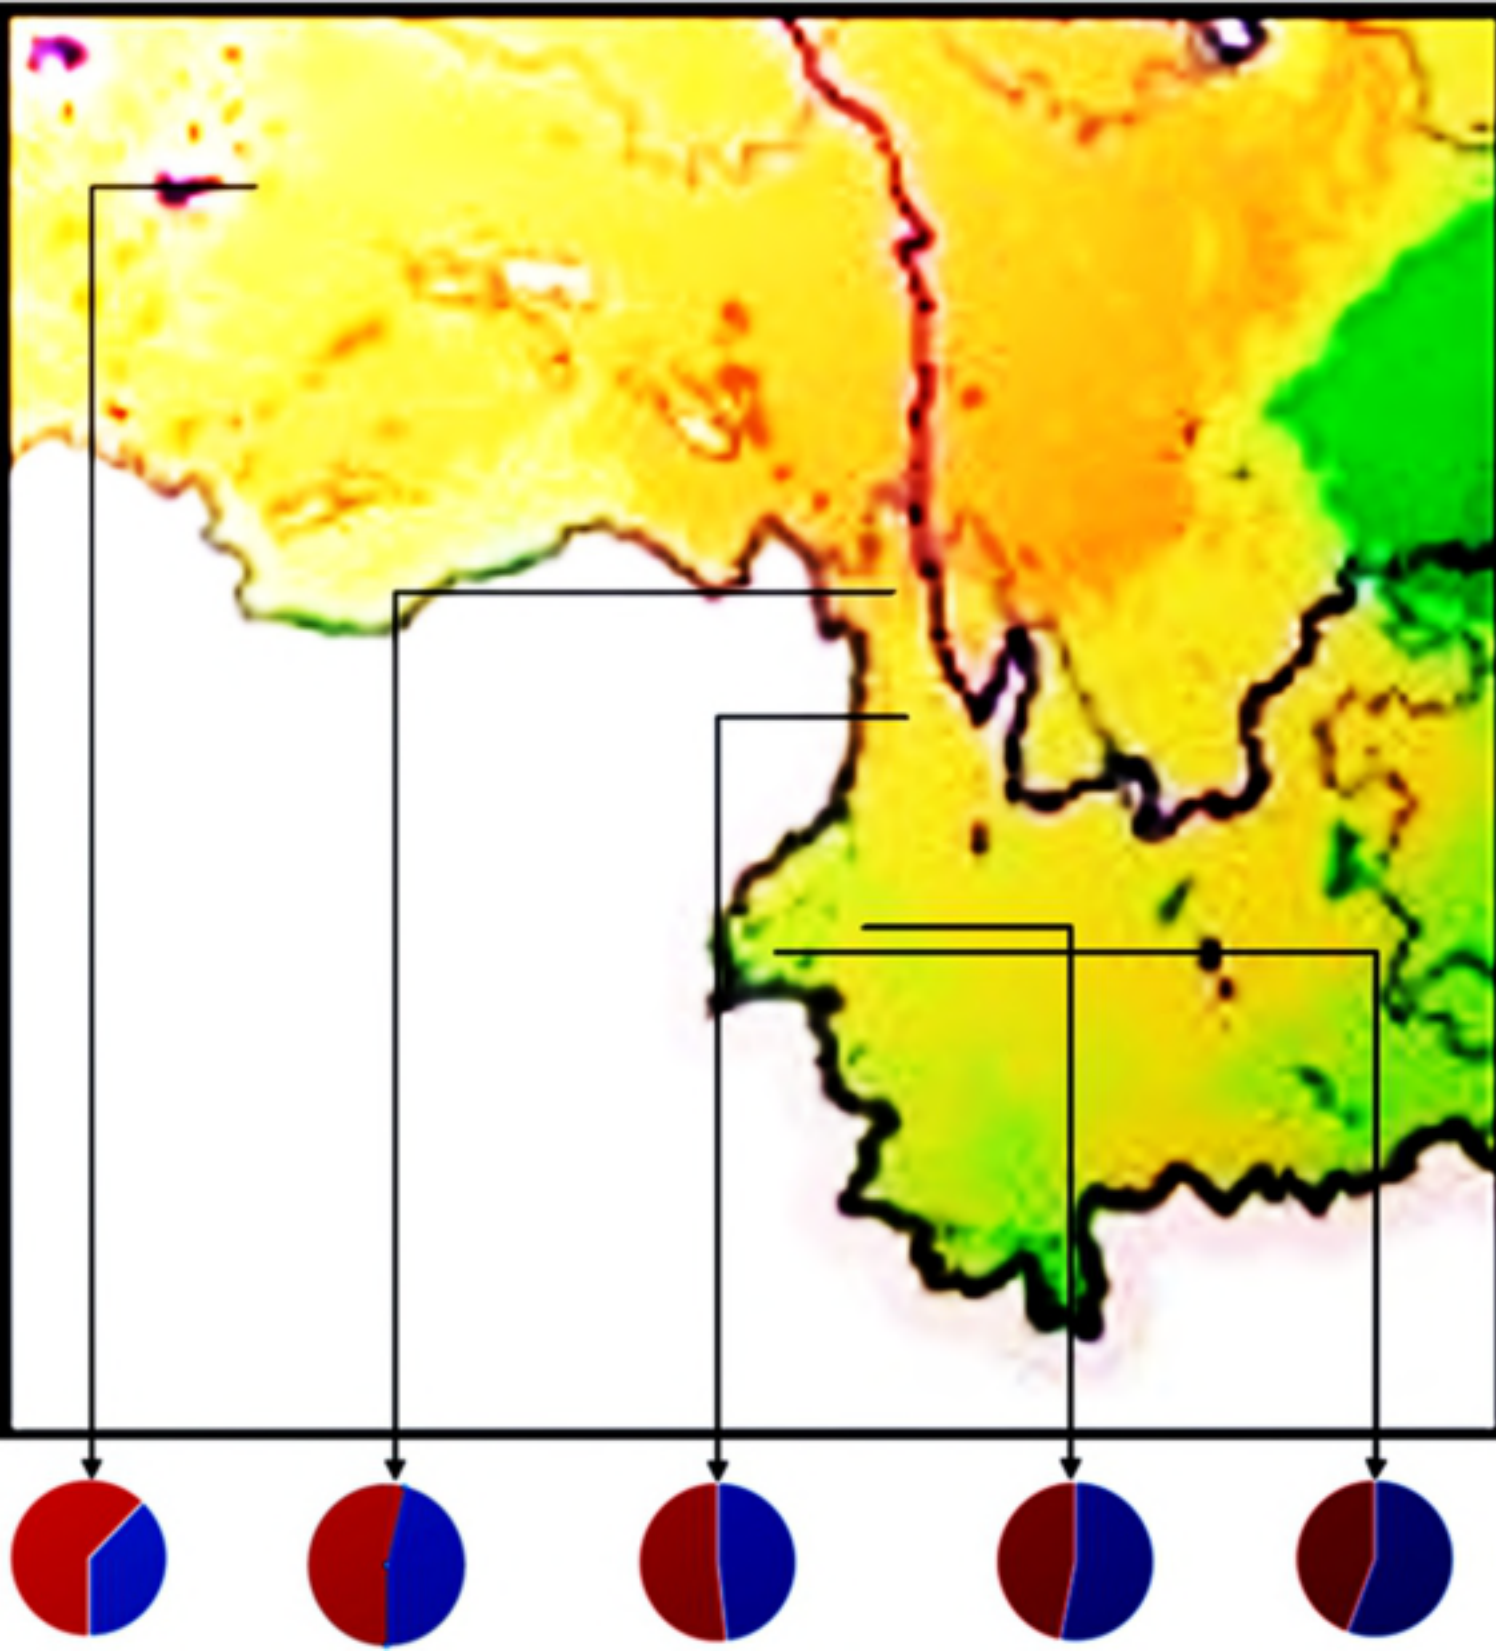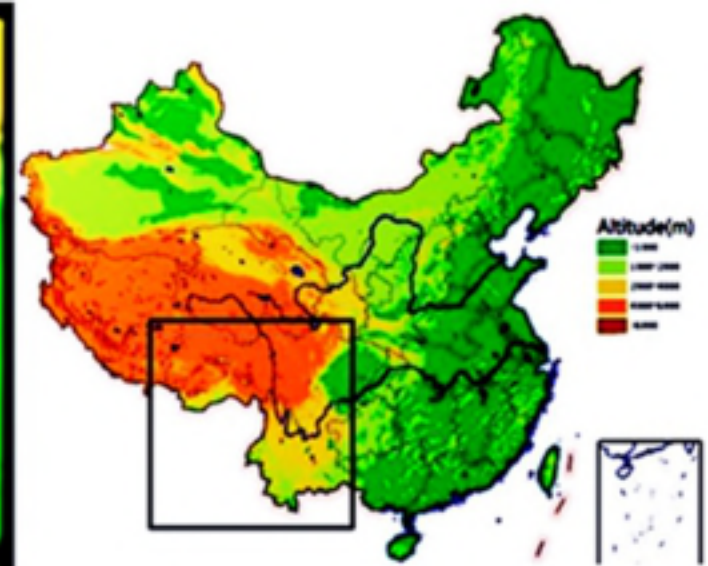

A

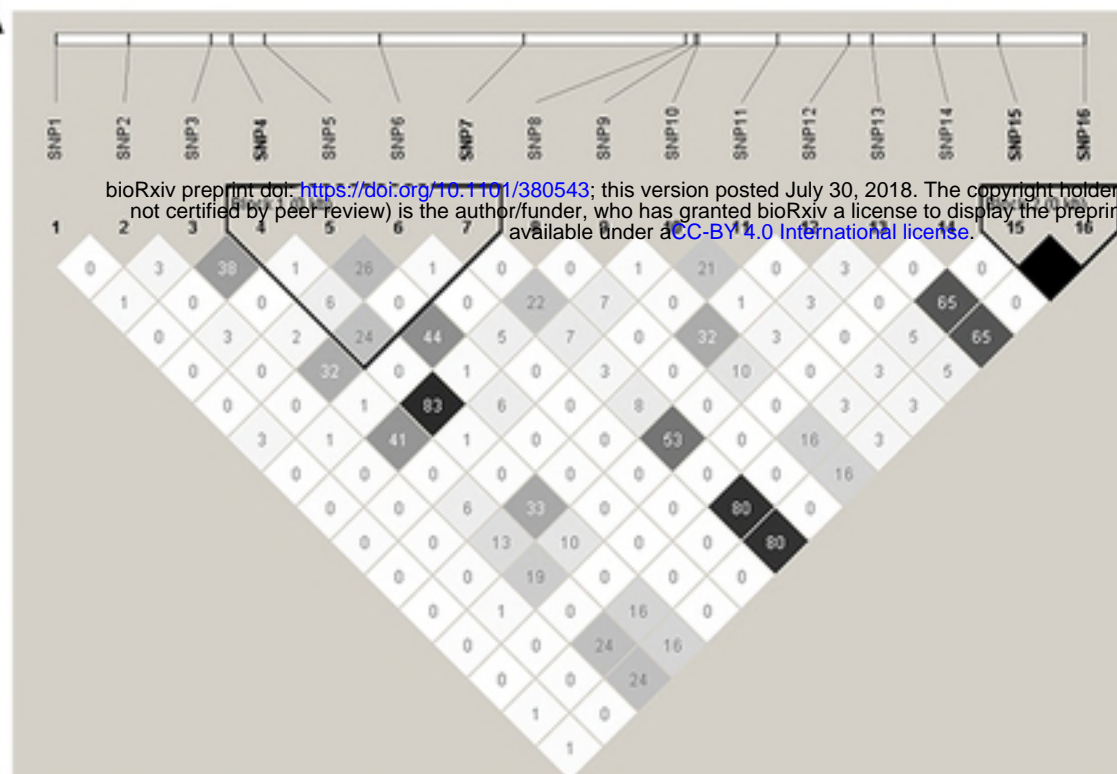

B

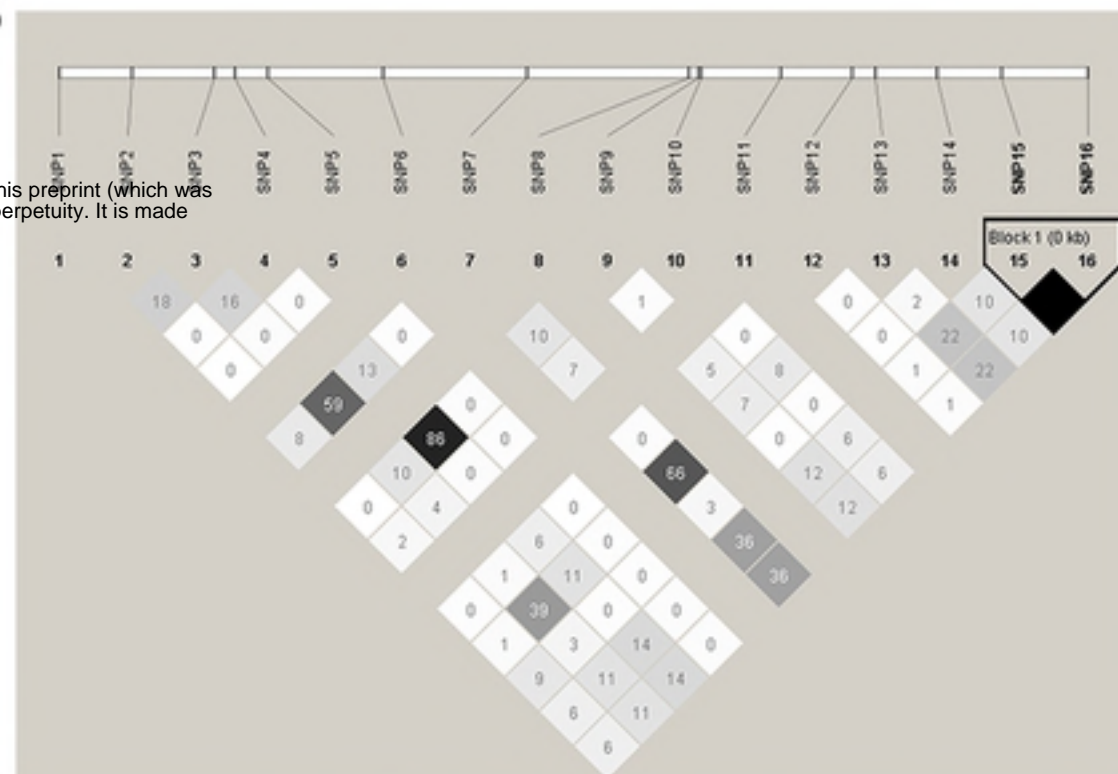

C

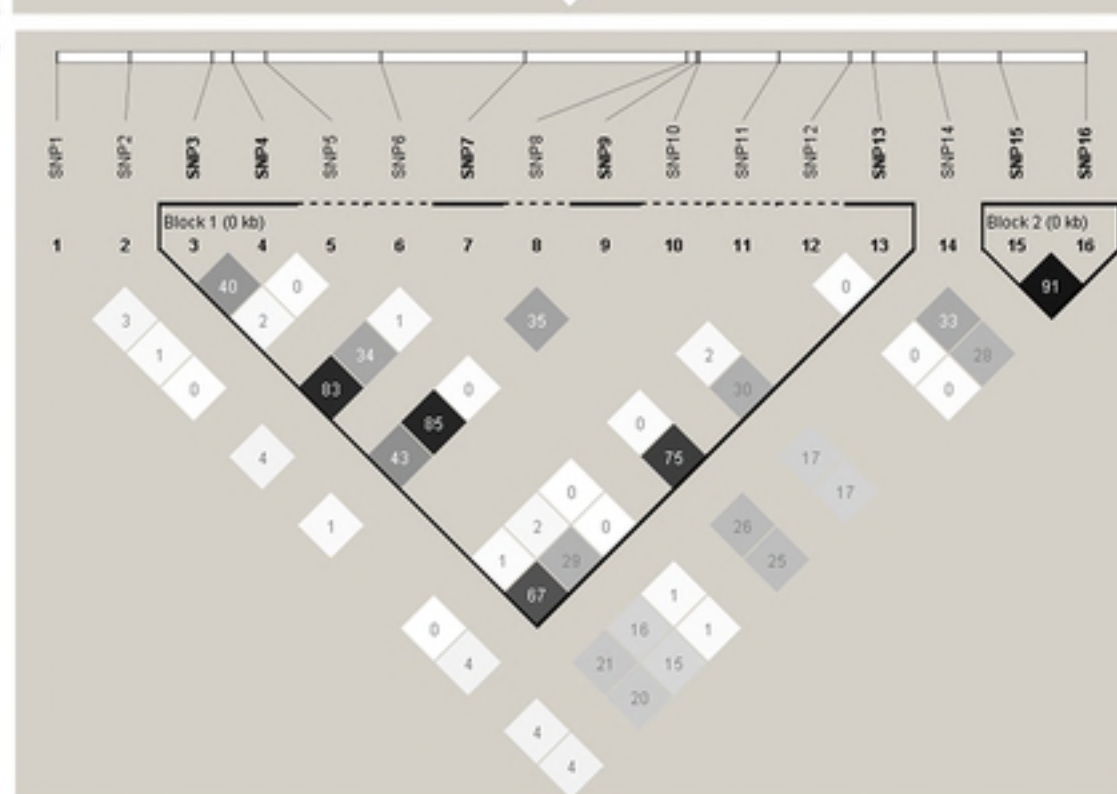

D

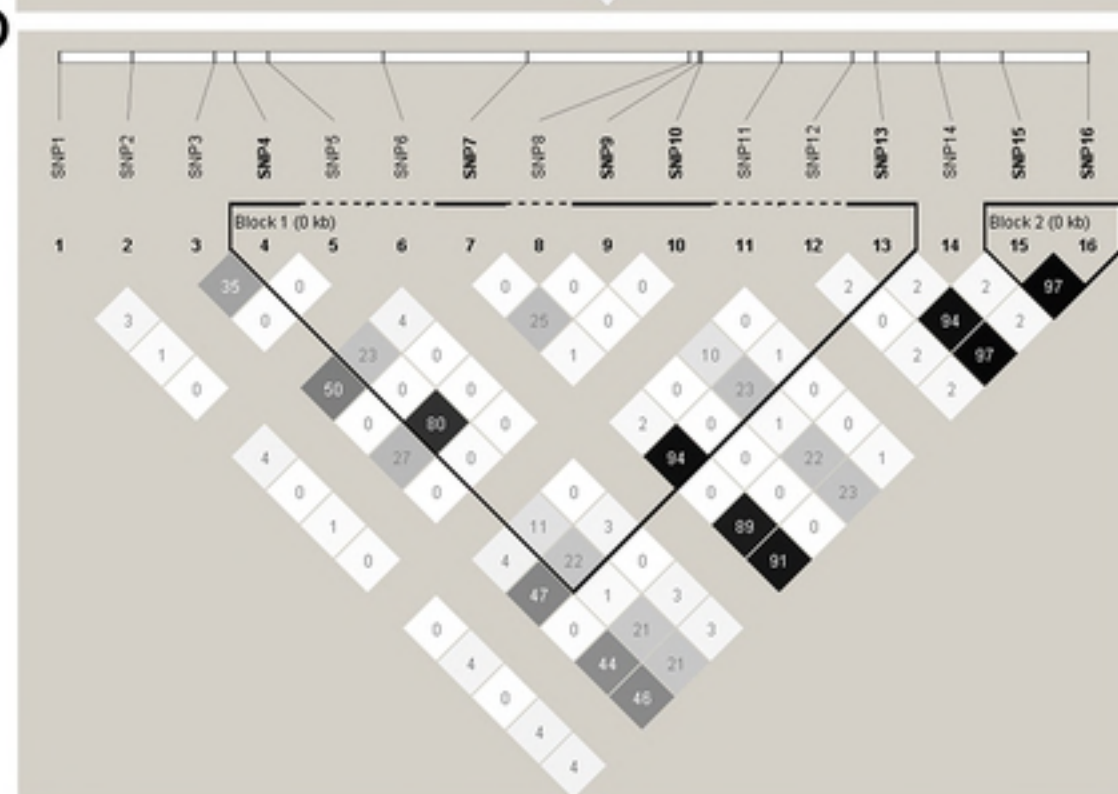

E

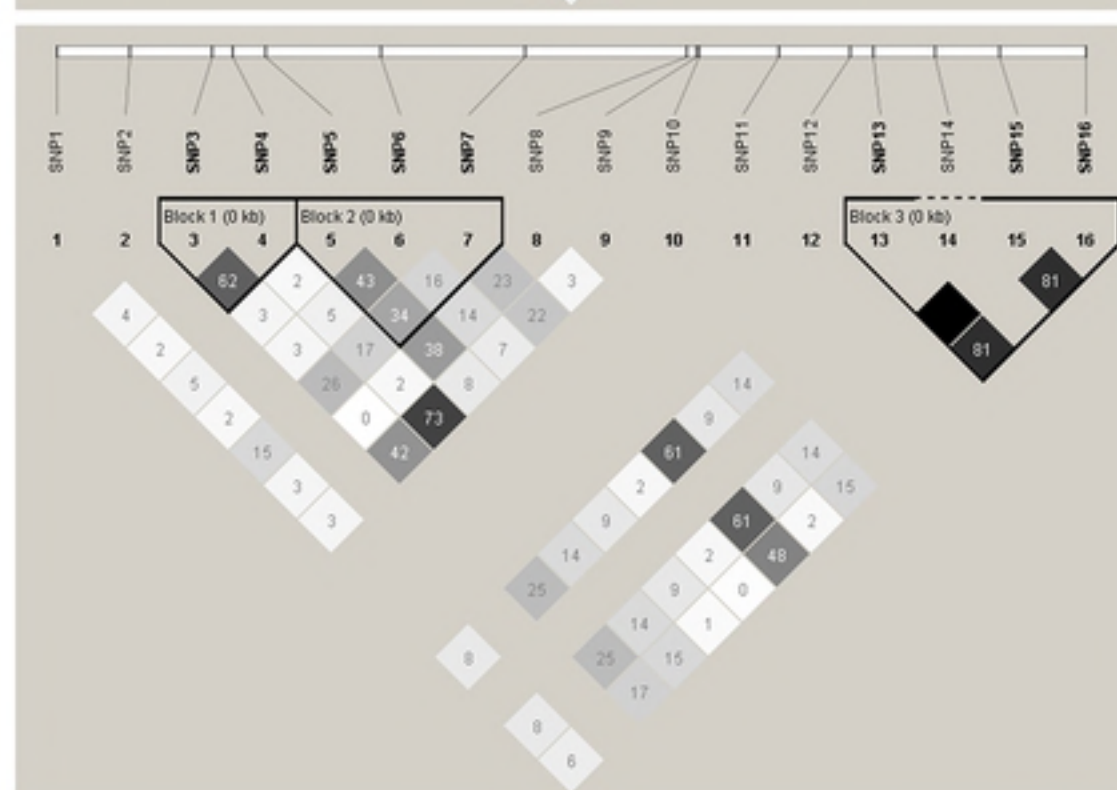

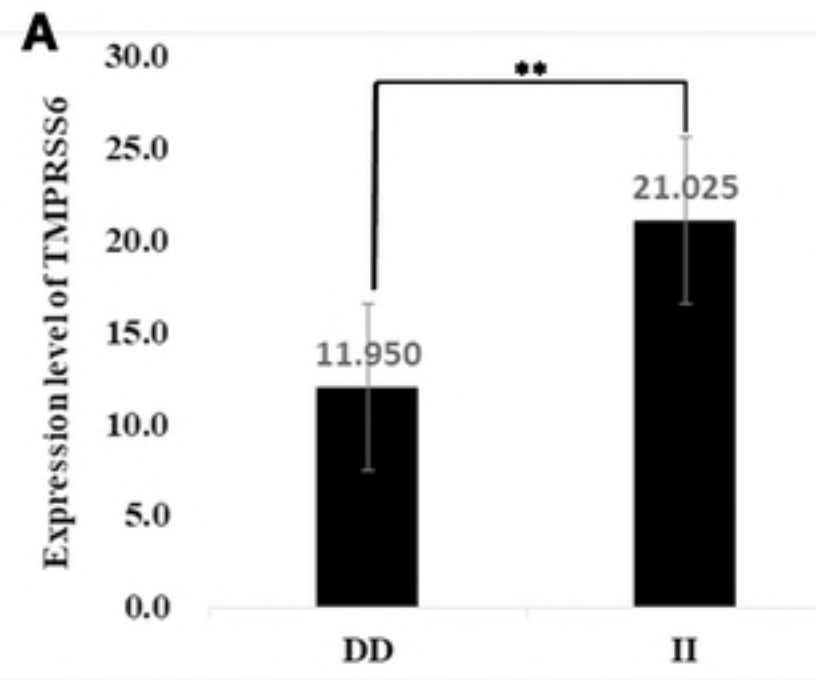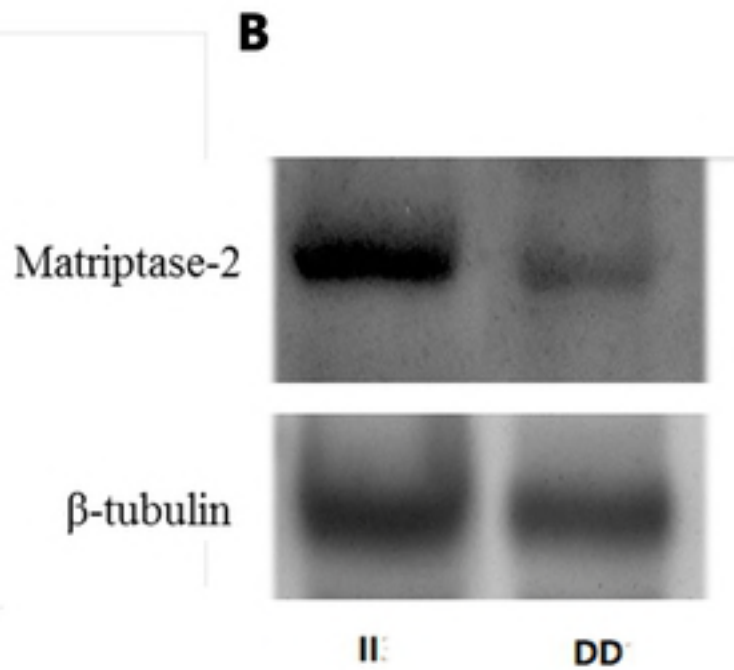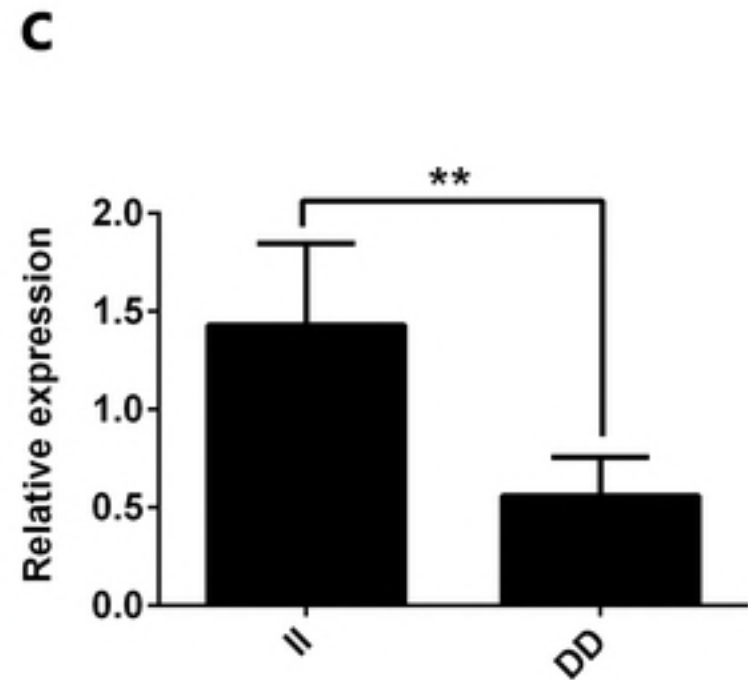

Source: http://biorxiv.org/content/10.1101/380543v1.full.pdf
